# Supplementary material
Source: Royal Society of Chemistry journal article supplement (doi:10.1039/d6el00026f)
Supplement: d6el00026f1.pdf [file d6el00026f1.pdf]

## Supporting Information

# Data-Driven Discovery of Novel Chalcogenide Semiconductors for Solar Absorption

Md Habibur Rahman, Arun Mannodi-Kanakkithodi\*

School of Materials Engineering, Purdue University, West Lafayette, IN 47907, USA

\*Corresponding author: amannodi@purdue.edu

## Construction of the $A_2BCX_4$ and $ABX_2$ Chemical Spaces

For the  $A_2BCX_4$  series, we considered 6 possible A cations, 6 B cations, 3 C cations, and 3 X anions. Fractional occupancies were permitted as follows:  $A = \{0, 0.5, 1, 1.5, 2\}$ ,  $B = \{0, 0.5, 1\}$ ,  $C = \{0, 0.5, 1\}$ , and  $X = \{0, 1, 2, 3, 4\}$ . E.g., the 6 possible monovalent cations at the A-site (Na, K, Rb, Cs, Cu, and Ag) could each adopt one of any of the fractional occupancies  $\{0, 0.5, 1, 1.5, 2\}$  such that the total sums to 2; analogous rules hold for every other site. Denoting these occupancies by  $\{a_1, a_2, a_3, a_4, a_5, a_6\}$ , non-negative solutions are sought for the equation:

$$a_1 + a_2 + a_3 + a_4 + a_5 + a_6 = 2, \quad a_i \in \{0, 0.5, 1, 1.5, 2\}.$$

The number of solutions is given by:

$$\binom{4 + 6 - 1}{6 - 1} = \binom{9}{5} = 126.$$

For the B, C, and X sites (list of all constituent chemical species shown in **Figure S2**), the number of valid solutions were calculated to be 21, 6, and 15, respectively, which ultimately leads to  $126 \times 21 \times 6 \times 15 = 238,140$  total compositions. Considering two types of nominal cation ordering (not accounting for the additional disorder with alloying) doubles

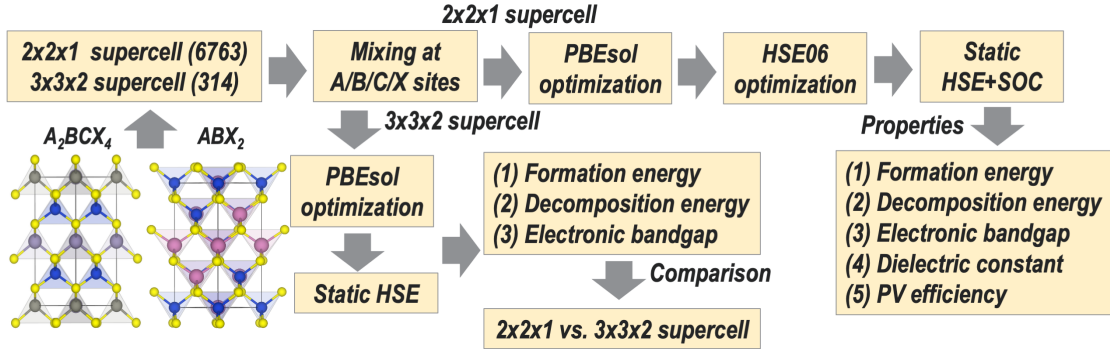

Figure S1: DFT workflow used in this study—targeted mixing at the A, B, C, and X sites was applied to  $2 \times 2 \times 1$  and  $3 \times 3 \times 2$  supercells, followed by geometry optimization using the PBEsol and HSE06 functionals. Finally, static HSE+SOC calculations were performed on the HSE06-optimized geometry to accurately determine the properties of interest.

this to 476,280. Out of these compounds, there are 648 pure unalloyed compositions, 12,960 compounds with only A-site mixing, 1,620 compounds with only B-site mixing, 648 compounds with only C-site missing, 2,592 compounds with only X-site mixing, and 457,812 total compounds with simultaneous mixing across multiple sites.

Similarly, for the  $ABX_2$  series, we considered 6 possible A cations, 3 B cations, and 3 X anions. To keep it consistent with the definitions for the  $A_2BCX_4$  series, fractional occupancies were allowed as:  $A = \{0, 0.25, 0.5, 0.75, 1\}$ ,  $B = \{0, 0.25, 0.5, 0.75, 1\}$ ,  $X = \{0, 0.5, 1, 1.5, 2\}$ . This leads to a total of 126, 15, and 15 possibilities for A-site mixing, B-site mixing, and X-site mixing, respectively, resulting in  $126 \times 15 \times 15 = 28,350$  unique compositions. Considering two types of nominal cation ordering again, this number doubles to 56,700. Among these 56,700 compositions, 108 are pure compounds, 2,160 involve only A-site mixing, 432 involve only B-site mixing, 432 involve only X-site mixing, and 53,568 involve simultaneous multi-site mixing.

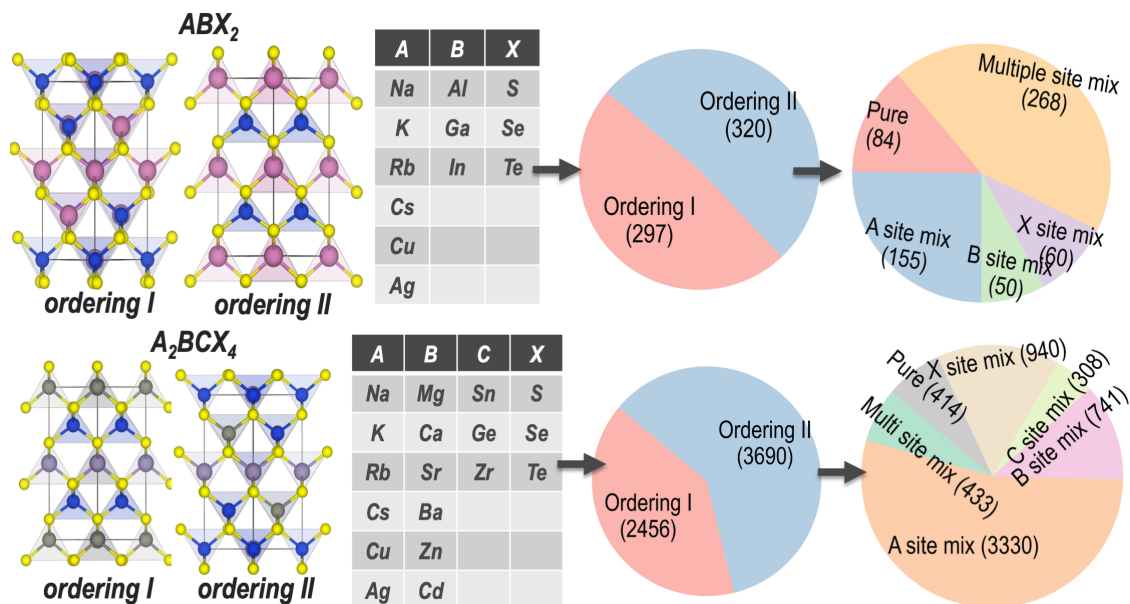

Figure S2: Construction of the  $ABX_2$  and  $A_2BCX_4$  datasets. (Left) Crystal prototypes considered. (Middle) Elemental space explored for A, B, C, and X sites. (Right) Distribution of generated compounds across structural orderings (ordering I vs ordering II for  $ABX_2$ ; ordering I vs ordering II for  $A_2BCX_4$ ) and across composition types (pure, single-site mixing, and multiple-site mixing). The total number of structures in each category is indicated in parentheses.

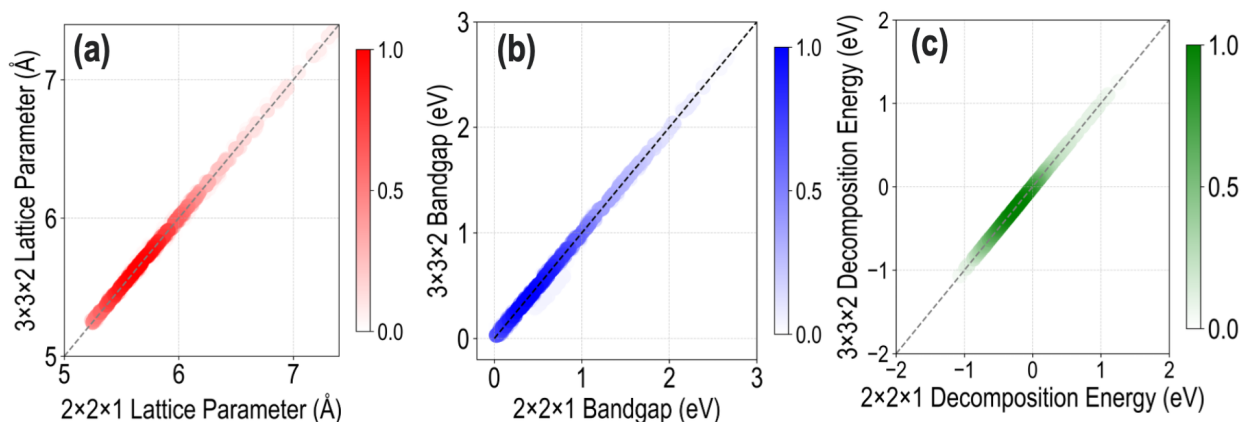

Figure S3: Comparison of DFT-computed (PBEsol) properties from  $2 \times 2 \times 1$  vs.  $3 \times 3 \times 2$ : (a) lattice constant, (b) decomposition energy, and (c) bandgap in terms of different cation ordering. The color bar indicates the point density (normalized from 0 to 1), where darker colors represent regions with a higher number of overlapping data points, and lighter colors indicate sparse or less populated regions in the property space.

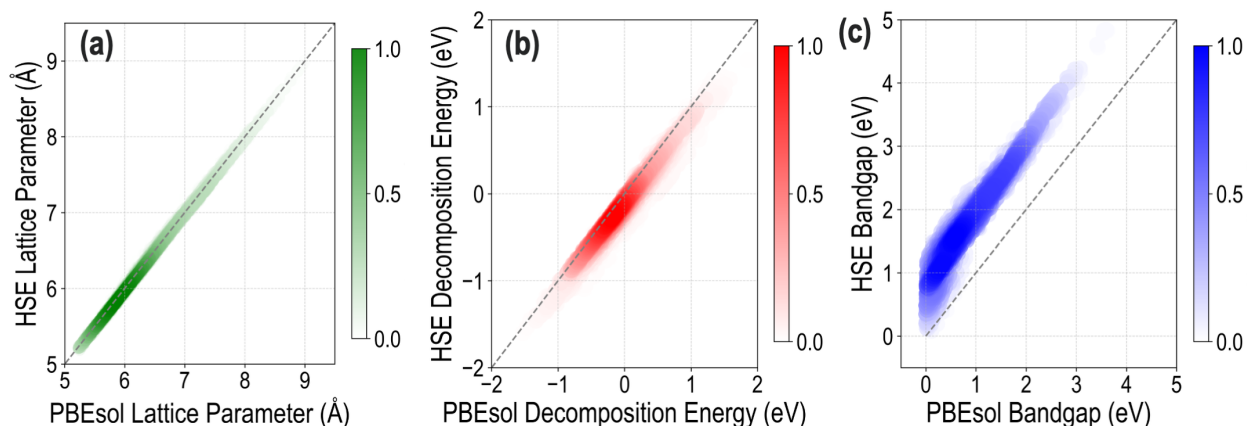

Figure S4: Comparison of DFT-computed properties from PBEsol and HSE06: (a) lattice constant, (b) decomposition energy, and (c) bandgap in terms of different cation ordering. The color bar indicates the point density (normalized from 0 to 1), where darker colors represent regions with a higher number of overlapping data points, and lighter colors indicate sparse or less populated regions in the property space.

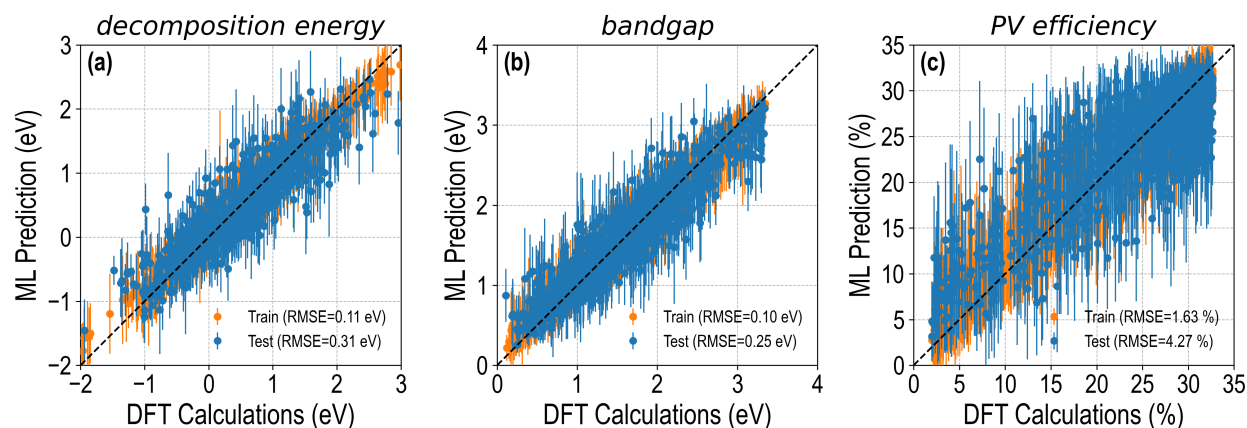

Figure S5: Parity plots for rigorously optimized random forest models for (a) decomposition energy, (b) bandgap, and (c) photovoltaic (PV) efficiency (SLME). The random forest models were trained on an initial dataset of 1,650 compounds with properties computed using the HSE+SOC functional. Error bars represent the standard deviation along with the minimum and maximum values obtained across 50 independently trained random forest models initialized with different random seeds.

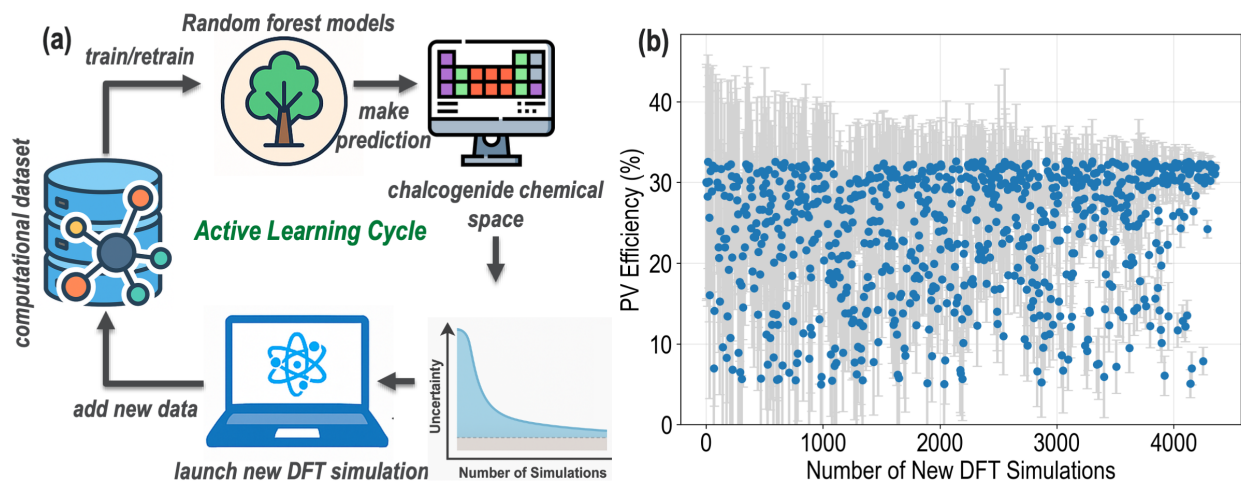

Figure S6: (a) Active learning (AL) workflow used in this study: photovoltaic (PV) efficiency across the remaining design space is initially predicted using a random forest model trained on only 1650 data points. An acquisition function is then employed to identify the most promising candidates for the next round of DFT data to be revealed. The random forest model is iteratively retrained with the newly acquired data and applied to the unexplored design space. (b) AL schedule illustrating the subsequent simulation batches selected via the acquisition function to improve the model and reduce the uncertainties.

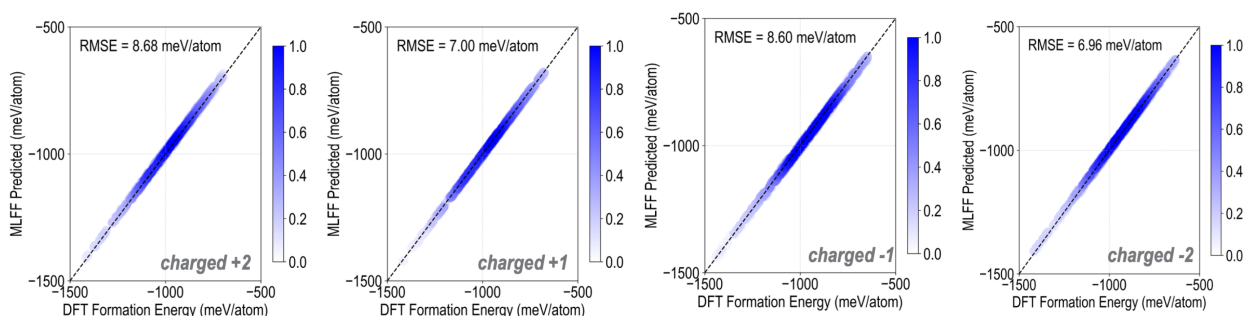

Figure S7: Parity plots comparing DFT crystal formation energies with MLFF-predicted values for four charge states ( $q = +2, +1, -1, \text{ and } -2$ ). The dashed line indicates perfect agreement ( $y = x$ ). The model achieves low prediction errors with RMSE values of 8.68, 7.00, 8.60, and 6.96 meV/atom for  $q = +2, +1, -1, \text{ and } -2$ , respectively. The color scale denotes the local point density.

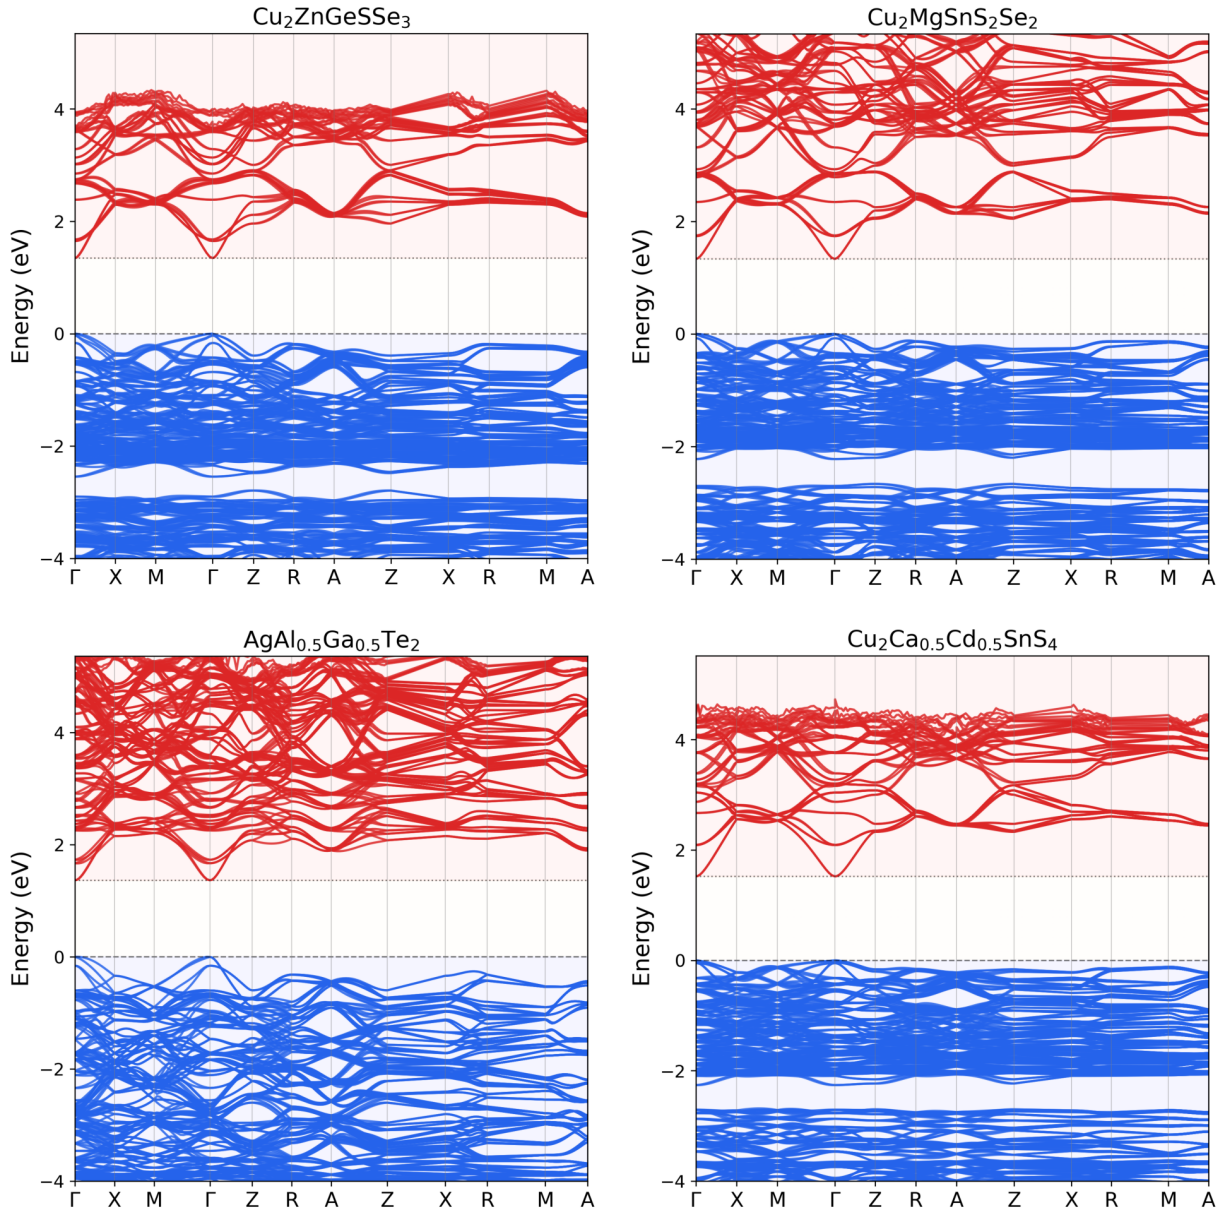

Figure S8: HSE+SOC electronic band structures of four selected top-ranked chalcogenide candidates: (a)  $\text{Cu}_2\text{ZnGeSSe}_3$ , (b)  $\text{Cu}_2\text{MgSnS}_2\text{Se}_2$ , (c)  $\text{AgAl}_{0.5}\text{Ga}_{0.5}\text{Te}_2$ , and (d)  $\text{Cu}_2\text{Ca}_{0.5}\text{Cd}_{0.5}\text{SnS}_4$ . These compounds span diverse compositions with  $E_{gap}$  in the 1.3–1.5 eV range, negative  $\Delta H_{decomp}$ , and high SLME values. The dispersive band edges suggest moderate effective masses favorable for carrier transport.

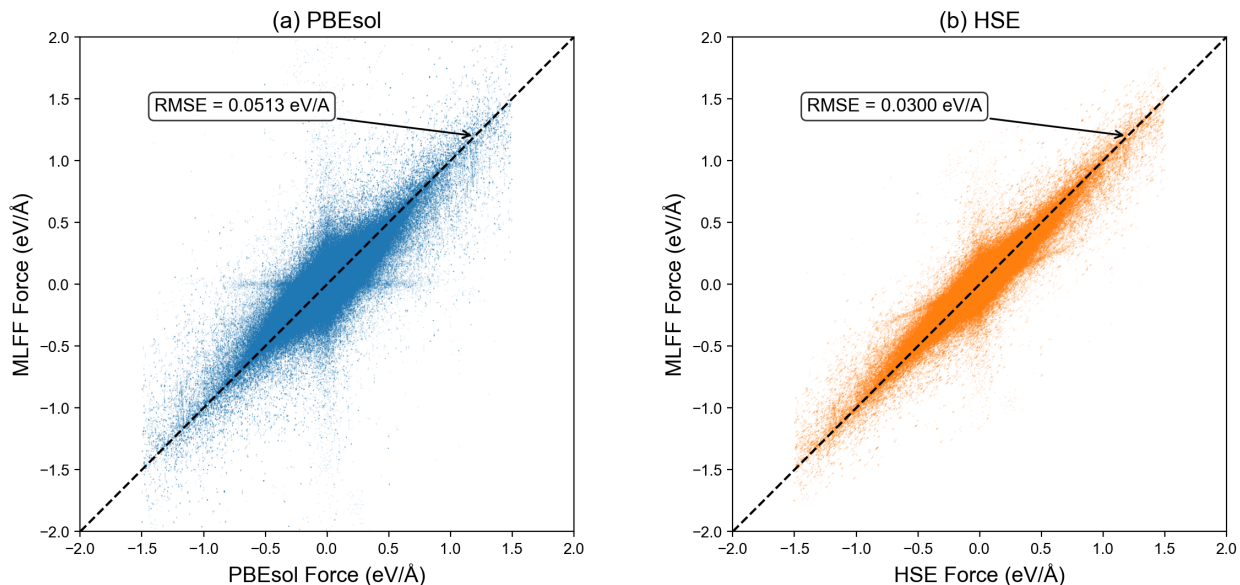

Figure S9: Parity plots of MLFF-predicted vs. DFT forces for neutral defect configurations: (a) PBEsol-trained MLFF (RMSE = 0.051 eV/Å) and (b) HSE-trained MLFF (RMSE = 0.030 eV/Å). The HSE-trained model shows tighter correlation and lower RMSE, confirming that training on HSE data yields more accurate force predictions for defect geometry optimization.

Table S1: Summary of key DFT input parameters used in this work.

| Parameter                    | $2 \times 2 \times 1$ Supercell      | $3 \times 3 \times 2$ Supercell |
|------------------------------|--------------------------------------|---------------------------------|
| Atoms per supercell          | 64                                   | 288                             |
| ENCUT (eV)                   | 500                                  | 500                             |
| k-grid (PBEsol relax)        | $a_i \times k_i \geq 30 \text{ \AA}$ | $\Gamma$ -only                  |
| k-grid (HSE06 relax)         | $a_i \times k_i \geq 20 \text{ \AA}$ | $\Gamma$ -only                  |
| k-grid (HSE06+SOC static)    | $a_i \times k_i \geq 30 \text{ \AA}$ | $\Gamma$ -only                  |
| EDIFF (eV)                   | $10^{-5}$                            | $10^{-5}$                       |
| EDIFFG (eV/Å)                | -0.01                                | static                          |
| HSE06 mixing ( $\alpha$ )    | 0.25                                 | 0.25                            |
| HSE06 screening ( $\omega$ ) | $0.2 \text{ \AA}^{-1}$               | $0.2 \text{ \AA}^{-1}$          |
| PAW pseudopotentials         | VASP 6.4.1 recommended               | VASP 6.4.1 recommended          |
| Smearing                     | Gaussian, 0.05 eV                    | Gaussian, 0.05 eV               |

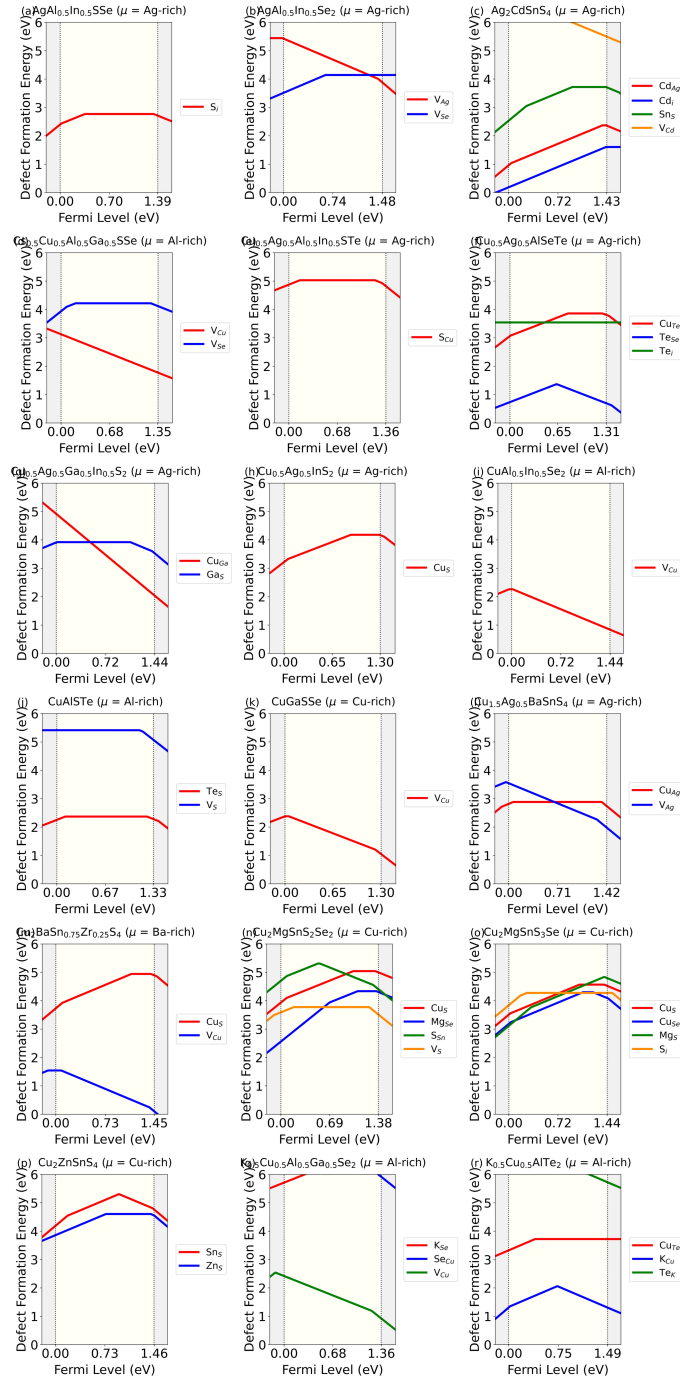

Figure S10: Defect formation energy diagrams under cation-rich chemical potential conditions for 18 representative compounds randomly selected from the 314-compound subset. Calculations were performed using  $3 \times 3 \times 2$  supercells (288 atoms) with full PBEsol geometry optimization followed by static HSE06 calculations, in five distinct charge states ( $q = +2$  to  $-2$ ). The selected compounds span Cu-, Ag-, K-, and Cs-containing systems with S, Se, Te, and mixed-anion chemistries. Dashed vertical lines indicate the VBM and CBM (conduction band minimum). The shaded regions outside the  $E_{gap}$  are shown in gray.

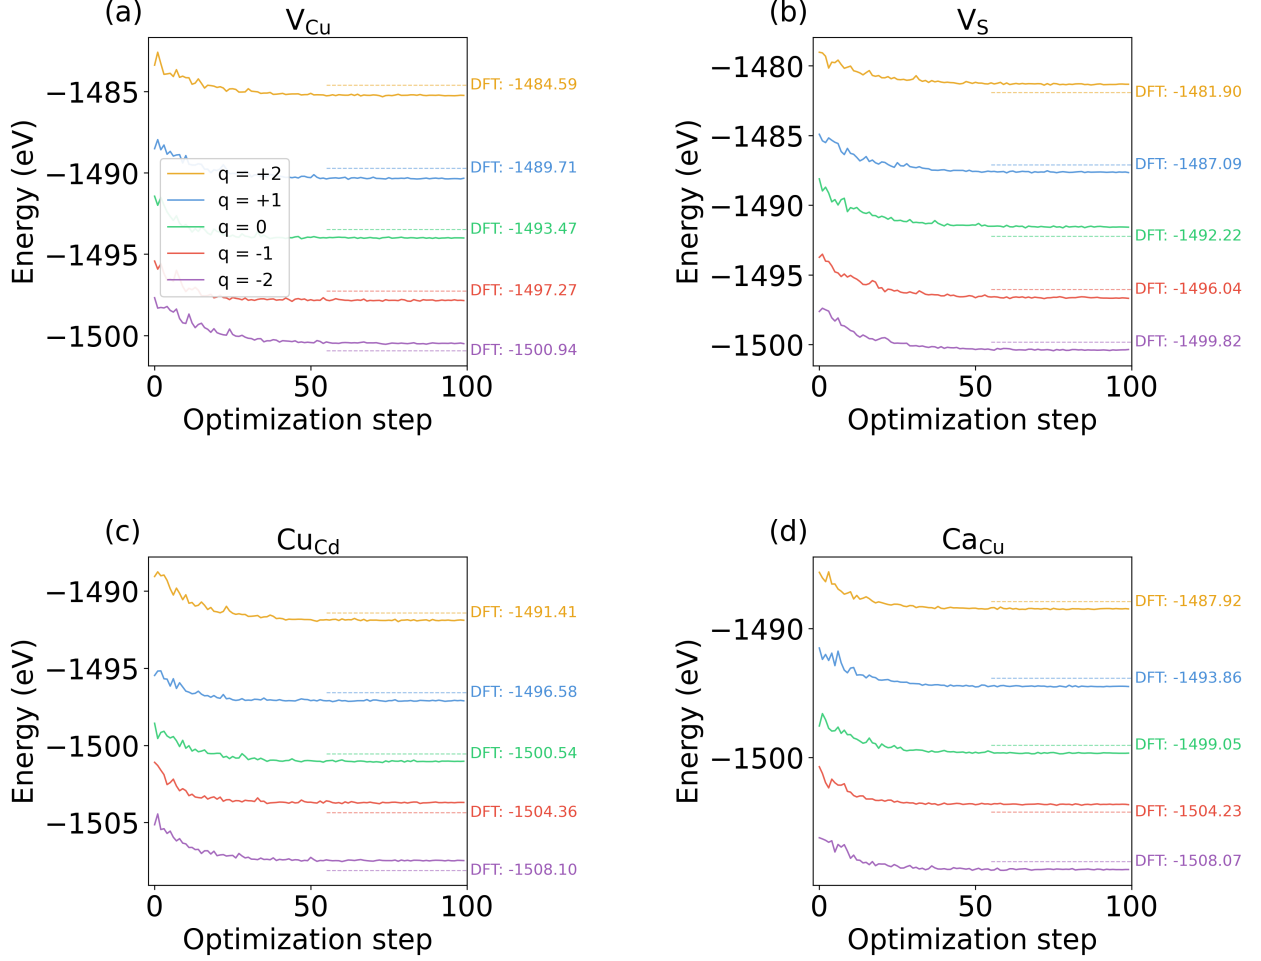

Figure S11: MLFF optimization convergence for four representative defects in  $Cu_2Ca_{0.5}Cd_{0.5}SnS_4$  across all five charge states ( $q = +2, +1, 0, -1, -2$ ): (a)  $V_{Cu}$ , (b)  $V_S$ , (c)  $Cu_{Cd}$ , and (d)  $Ca_{Cu}$ . Solid lines show the MLFF energy during geometry optimization and dashed lines indicate the corresponding DFT total energies. The MLFF-relaxed energies converge to within  $\sim 0.5$ – $0.7$  eV of the DFT reference values, with no systematic overestimation or underestimation across charge states.

Table S2: Structural comparison between PBEsol and HSE relaxed geometries for  $Ag_1Al_{0.5}Ga_{0.5}S_2$ .

| Property                      | HSE   | PBEsol |
|-------------------------------|-------|--------|
| <i>Lattice parameters</i>     |       |        |
| $a$ (Å)                       | 5.63  | 5.62   |
| $c$ (Å)                       | 10.43 | 10.41  |
| <i>Bond lengths (mean, Å)</i> |       |        |
| Al–S                          | 2.25  | 2.23   |
| Ga–S                          | 2.26  | 2.25   |
| Ag–S                          | 2.51  | 2.48   |

# Computational Definitions of Formation and Decomposition Energies

## Energy normalization

The total energy  $E_{tot}$  is obtained from DFT. If the supercell contains  $N_{sc}$  atoms and one formula unit contains  $N_{fu}$  atoms, then the energy per formula unit is

$$E_{pfu} = \frac{E_{tot}}{N_{sc}} \times N_{fu}.$$

## Formation energy

The formation energy is computed as the difference between the compound energy and the sum of the reference elemental energies, divided by the number of atoms in the formula unit.

For  $Ag_2Ca_{0.5}Sr_{0.5}Sn_{0.5}Ge_{0.5}S_2Te_2$ :

$$\Delta H_{form} = \frac{1}{8} \left[ E(Ag_2Ca_{0.5}Sr_{0.5}Sn_{0.5}Ge_{0.5}S_2Te_2) - 2E(Ag) - 0.5E(Ca) - 0.5E(Sr) - 0.5E(Sn) - 0.5E(Ge) - 2E(S) - 2E(Te) \right]. \quad (S1)$$

Here the denominator (8) is the total number of atoms per formula unit.

## Decomposition energy for $A_2BCX_4$ compounds

Decomposition is evaluated relative to the most likely set of binary competing phases: -  $A-X$  binaries of type  $A_2X$ , -  $B-X$  binaries of type  $BX$ , -  $C-X$  binaries of type  $CX_2$ . The weights for each binary are determined from stoichiometry: - For the  $A-X$  channel, the weight is  $(n_A/2) \times (n_X/4)$ , where  $n_A$  and  $n_X$  are the counts of  $A$  and  $X$  atoms in the formula. - For the  $B-X$  channel, the weight is  $(n_B/1) \times (n_X/4)$ . - For the  $C-X$  channel, the weight is  $(n_C/1) \times (n_X/4)$ . The total competing energy is the sum of all binary references multiplied

by their weights. The decomposition enthalpy is then

$$\Delta H_{decomp} = E_{pfu} - S,$$

where  $S$  is the weighted sum of binary reference energies.

**Worked example:**  $Ag_2Ca_{0.5}Sr_{0.5}Sn_{0.5}Ge_{0.5}S_2Te_2$

For this composition: -  $A = Ag$  (2 atoms),  $B = Ca, Sr$  (0.5 each),  $C = Sn, Ge$  (0.5 each),  $X = S, Te$  (2 each). Weights are: -  $Ag_2S$  and  $Ag_2Te$ : each weight =  $(2/2) \times (2/4) = 0.5$ . -  $CaS, CaTe, SrS, SrTe$ : each weight =  $(0.5/1) \times (2/4) = 0.25$ . -  $SnS_2, SnTe_2, GeS_2, GeTe_2$ : each weight =  $(0.5/1) \times (2/4) = 0.25$ . Thus the competing energy is

$$\begin{aligned} S = & 0.5(E(Ag_2S) + E(Ag_2Te)) \\ & + 0.25(E(CaS) + E(CaTe) + E(SrS) + E(SrTe)) \\ & + 0.25(E(SnS_2) + E(SnTe_2) + E(GeS_2) + E(GeTe_2)). \end{aligned} \quad (S2)$$

The decomposition enthalpy is

$$\Delta H_{decomp} = E(Ag_2Ca_{0.5}Sr_{0.5}Sn_{0.5}Ge_{0.5}S_2Te_2) - S.$$

To account for mixing, a configurational entropy correction is added:

$$\Delta G_{mix} = k_B T \sum_j f_j \ln f_j,$$

where  $f_j$  are the mixing fractions for each binary. For this compound: Two channels with fraction 0.5 (Ag–S and Ag–Te) and Eight channels with fraction 0.25 (Ca/Sr with S/Te,

Sn/Ge with S/Te). So:

$$\Delta G_{mix} = k_B T [ 2 \cdot (0.5 \ln 0.5) + 8 \cdot (0.25 \ln 0.25) ] = -5 k_B T \ln 2.$$

The full decomposition energy is

$$E_{decomp} = \Delta H_{decomp} + \Delta G_{mix}.$$

Negative  $E_{decomp}$  means the compound is stable against decomposition into the chosen binaries whereas Positive  $E_{decomp}$  means the compound tends to decompose.

## List of Defects Considered for Each Compound

The following table summarizes, for each compound, the list of defects considered in our calculations. While detailed defect formation energy diagrams are presented for selected case studies for the sake of brevity, the entire defect dataset spans over 1,000 native point defect configurations across 314 compounds, each computed using a  $3 \times 3 \times 2$  supercell with PBEsol geometry optimization followed by static HSE06 calculations. Representative defect formation energy diagrams for 18 randomly selected compounds under cation-rich chemical potential conditions are provided in **Figure S10**. General trends include: (i) Cu/Ag vacancies are consistently the lowest-energy acceptors, supporting p-type conductivity; (ii) anion-related defect energetics are sensitive to the anion species, with Te-containing compounds showing higher formation energy defects; (iii) anti-site defects involving B/C-site cations most frequently introduce deep levels in the  $E_{gap}$ ; and (iv) several compounds exhibit high minimum defect formation energies ( $> 3$  eV) across the entire  $E_{gap}$ , indicating strong defect tolerance.

Table S3: List of native point defects considered for each compound, organized by composition and cation ordering. Defect calculations were performed in  $3 \times 3 \times 2$  supercells using PBEsol geometry optimization followed by static HSE06 electronic structure calculations in five charge states ( $q = +2, +1, 0, -1, -2$ ).

| Compound                                              | Ordering    | Defects Considered                                                                                                             |
|-------------------------------------------------------|-------------|--------------------------------------------------------------------------------------------------------------------------------|
| AgAl <sub>0.5</sub> Ga <sub>0.5</sub> S <sub>2</sub>  | Ordering I  | V <sub>S</sub> , V <sub>Al</sub>                                                                                               |
| AgAl <sub>0.5</sub> Ga <sub>0.5</sub> Se <sub>2</sub> | Ordering I  | Ag <sub>Se</sub> , V <sub>Al</sub> , Se <sub>Al</sub>                                                                          |
| AgAl <sub>0.5</sub> Ga <sub>0.5</sub> Se <sub>2</sub> | Ordering II | Ag <sub>Ga</sub> , V <sub>Ag</sub> , Ga <sub>i</sub> , Ga <sub>Ag</sub>                                                        |
| AgAl <sub>0.5</sub> Ga <sub>0.5</sub> Te <sub>2</sub> | Ordering II | Al <sub>Ga</sub> , Ag <sub>Ga</sub> , V <sub>Te</sub> , Ga <sub>Al</sub>                                                       |
| AgAl <sub>0.5</sub> In <sub>0.5</sub> SSe             | Ordering I  | Se <sub>S</sub> , S <sub>Ag</sub> , Al <sub>In</sub> , Ag <sub>Al</sub> , In <sub>Al</sub> , V <sub>Al</sub> , In <sub>S</sub> |
| AgAl <sub>0.5</sub> In <sub>0.5</sub> SSe             | Ordering II | S <sub>i</sub> , Al <sub>S</sub> , Se <sub>S</sub>                                                                             |
| AgAl <sub>0.5</sub> In <sub>0.5</sub> S <sub>2</sub>  | Ordering I  | V <sub>Al</sub> , In <sub>Al</sub>                                                                                             |
| AgAl <sub>0.5</sub> In <sub>0.5</sub> Se <sub>2</sub> | Ordering I  | In <sub>Al</sub> , V <sub>Al</sub> , V <sub>Se</sub> , V <sub>Ag</sub> , Al <sub>Se</sub>                                      |
| AgAl <sub>0.5</sub> In <sub>0.5</sub> Se <sub>2</sub> | Ordering II | Ag <sub>i</sub> , Al <sub>i</sub> , V <sub>Se</sub>                                                                            |
| AgAl <sub>0.5</sub> In <sub>0.5</sub> Te <sub>2</sub> | Ordering II | V <sub>Al</sub>                                                                                                                |
| AgAlSSe                                               | Ordering I  | Se <sub>S</sub> , V <sub>Se</sub> , Ag <sub>S</sub> , Se <sub>Ag</sub>                                                         |
| AgAlS <sub>2</sub>                                    | Ordering I  | V <sub>S</sub> , Al <sub>S</sub>                                                                                               |
| AgAlS <sub>2</sub>                                    | Ordering II | V <sub>S</sub> , Al <sub>S</sub>                                                                                               |
| AgAlSe <sub>2</sub>                                   | Ordering I  | V <sub>Se</sub> , Al <sub>i</sub>                                                                                              |
| AgAlSe <sub>2</sub>                                   | Ordering II | Ag <sub>Se</sub> , Al <sub>Ag</sub> , Al <sub>Se</sub>                                                                         |
| AgAlTe <sub>2</sub>                                   | Ordering I  | Te <sub>Ag</sub> , Al <sub>i</sub> , Ag <sub>Al</sub>                                                                          |
| AgAlTe <sub>2</sub>                                   | Ordering II | V <sub>Ag</sub>                                                                                                                |

Continued on next page

Table S3 – continued from previous page

| Compound                                                 | Ordering    | Defects Considered                                                                                                    |
|----------------------------------------------------------|-------------|-----------------------------------------------------------------------------------------------------------------------|
| $\text{AgGa}_{0.5}\text{In}_{0.5}\text{S}_2$             | Ordering I  | $\text{Ag}_i, \text{Ag}_{\text{In}}, \text{S}_{\text{In}}$                                                            |
| $\text{AgGa}_{0.5}\text{In}_{0.5}\text{S}_2$             | Ordering II | $\text{In}_{\text{Ga}}$                                                                                               |
| $\text{AgGa}_{0.5}\text{In}_{0.5}\text{Se}_2$            | Ordering I  | $\text{Ag}_i, \text{V}_{\text{Ag}}$                                                                                   |
| $\text{AgGa}_{0.5}\text{In}_{0.5}\text{Se}_2$            | Ordering II | $\text{V}_{\text{Ga}}$                                                                                                |
| $\text{AgGaSTe}$                                         | Ordering I  | $\text{Te}_{\text{Ga}}, \text{Ag}_{\text{Te}}$                                                                        |
| $\text{AgGaSTe}$                                         | Ordering II | $\text{Ga}_i, \text{Ag}_i, \text{Te}_{\text{Ga}}, \text{V}_{\text{Ag}}$                                               |
| $\text{AgGaS}_2$                                         | Ordering I  | $\text{V}_{\text{S}}, \text{Ag}_{\text{Ga}}, \text{Ga}_i$                                                             |
| $\text{AgGaS}_2$                                         | Ordering II | $\text{Ga}_{\text{Ag}}, \text{Ag}_{\text{S}}$                                                                         |
| $\text{AgGaSeTe}$                                        | Ordering II | $\text{Ag}_{\text{Ga}}, \text{Ga}_{\text{Te}}, \text{Te}_{\text{Ga}}$                                                 |
| $\text{AgGaSe}_2$                                        | Ordering I  | $\text{Ag}_{\text{Se}}$                                                                                               |
| $\text{AgGaSe}_2$                                        | Ordering II | $\text{V}_{\text{Ga}}, \text{Ga}_{\text{Se}}, \text{Ag}_{\text{Se}}$                                                  |
| $\text{AgInSSe}$                                         | Ordering I  | $\text{Ag}_i, \text{S}_{\text{In}}, \text{In}_{\text{Ag}}, \text{Ag}_{\text{Se}}$                                     |
| $\text{AgInSSe}$                                         | Ordering II | $\text{V}_{\text{Ag}}$                                                                                                |
| $\text{AgInSe}_2$                                        | Ordering I  | $\text{Se}_{\text{Ag}}$                                                                                               |
| $\text{AgInSe}_2$                                        | Ordering II | $\text{V}_{\text{Ag}}$                                                                                                |
| $\text{Ag}_2\text{BaGeSe}_4$                             | Ordering II | $\text{Ag}_{\text{Ge}}, \text{V}_{\text{Ba}}, \text{V}_{\text{Ge}}$                                                   |
| $\text{Ag}_2\text{BaSnS}_4$                              | Ordering I  | $\text{Ag}_{\text{Sn}}$                                                                                               |
| $\text{Ag}_2\text{BaSnS}_4$                              | Ordering II | $\text{Sn}_{\text{Ba}}, \text{V}_{\text{Sn}}, \text{V}_{\text{S}}$                                                    |
| $\text{Ag}_2\text{Ca}_{0.5}\text{Cd}_{0.5}\text{ZrSe}_4$ | Ordering I  | $\text{Zr}_{\text{Ca}}, \text{Cd}_i, \text{V}_{\text{Cd}}, \text{Zr}_i, \text{Zr}_{\text{Cd}}, \text{Cd}_{\text{Ag}}$ |

Continued on next page

Table S3 – continued from previous page

| Compound                                                 | Ordering    | Defects Considered                                                                                                             |
|----------------------------------------------------------|-------------|--------------------------------------------------------------------------------------------------------------------------------|
| $\text{Ag}_2\text{Ca}_{0.5}\text{Cd}_{0.5}\text{ZrSe}_4$ | Ordering II | $\text{Zr}_i, \text{Zr}_{\text{Se}}, \text{V}_{\text{Se}}, \text{V}_{\text{Cd}}, \text{Se}_{\text{Ca}}, \text{Se}_{\text{Zr}}$ |
| $\text{Ag}_2\text{CaGeSSeTe}_2$                          | Ordering I  | $\text{S}_{\text{Ca}}, \text{Ag}_{\text{Se}}, \text{S}_{\text{Te}}$                                                            |
| $\text{Ag}_2\text{CaGeSSe}_3$                            | Ordering I  | $\text{Ca}_S, \text{V}_{\text{Ag}}, \text{Ge}_{\text{Se}}, \text{Ag}_{\text{Ca}}$                                              |
| $\text{Ag}_2\text{CaGeSSe}_3$                            | Ordering II | $\text{Ge}_i, \text{Se}_{\text{Ge}}$                                                                                           |
| $\text{Ag}_2\text{CaGeS}_2\text{SeTe}$                   | Ordering I  | $\text{Ca}_{\text{Se}}, \text{Ge}_{\text{Ag}}, \text{Se}_{\text{Ag}}, \text{Te}_i$                                             |
| $\text{Ag}_2\text{CaGeS}_2\text{SeTe}$                   | Ordering II | $\text{V}_S, \text{Se}_{\text{Ag}}$                                                                                            |
| $\text{Ag}_2\text{CaGeS}_4$                              | Ordering II | $\text{Ag}_i, \text{Ge}_i$                                                                                                     |
| $\text{Ag}_2\text{CaGeSe}_4$                             | Ordering II | $\text{Se}_i, \text{Ca}_{\text{Se}}$                                                                                           |
| $\text{Ag}_2\text{CaSnS}_4$                              | Ordering I  | $\text{Ag}_{\text{Ca}}, \text{Sn}_{\text{Ca}}$                                                                                 |
| $\text{Ag}_2\text{CaSnS}_4$                              | Ordering II | $\text{Ca}_S, \text{Sn}_{\text{Ca}}, \text{V}_{\text{Sn}}, \text{S}_{\text{Sn}}, \text{Ca}_{\text{Sn}}, \text{Ca}_{\text{Ag}}$ |
| $\text{Ag}_2\text{CdGeS}_4$                              | Ordering II | $\text{V}_{\text{Cd}}, \text{S}_{\text{Ag}}, \text{Cd}_S, \text{Ge}_{\text{Ag}}, \text{Ag}_{\text{Cd}}, \text{S}_i$            |
| $\text{Ag}_2\text{CdGeSe}_4$                             | Ordering I  | $\text{Se}_{\text{Ge}}, \text{Cd}_{\text{Ag}}, \text{V}_{\text{Ag}}, \text{Se}_{\text{Ag}}$                                    |
| $\text{Ag}_2\text{CdGeSe}_4$                             | Ordering II | $\text{Cd}_{\text{Ge}}, \text{Ge}_{\text{Se}}, \text{Cd}_i, \text{Ag}_{\text{Se}}, \text{Cd}_{\text{Se}}$                      |
| $\text{Ag}_2\text{CdSnS}_4$                              | Ordering I  | $\text{Sn}_S, \text{Cd}_{\text{Ag}}, \text{Cd}_i, \text{S}_{\text{Ag}}, \text{V}_{\text{Cd}}$                                  |
| $\text{Ag}_2\text{CdSnSe}_4$                             | Ordering I  | $\text{V}_{\text{Cd}}, \text{Sn}_{\text{Cd}}$                                                                                  |
| $\text{Ag}_2\text{CdSnSe}_4$                             | Ordering II | $\text{Sn}_{\text{Ag}}, \text{Sn}_i$                                                                                           |
| $\text{Ag}_2\text{Mg}_{0.5}\text{Ba}_{0.5}\text{ZrS}_4$  | Ordering I  | $\text{V}_{\text{Mg}}, \text{Zr}_{\text{Ba}}, \text{Mg}_S$                                                                     |
| $\text{Ag}_2\text{Mg}_{0.5}\text{Ba}_{0.5}\text{ZrS}_4$  | Ordering II | $\text{Mg}_S, \text{S}_i, \text{Ag}_S, \text{V}_S, \text{S}_{\text{Zr}}, \text{Ag}_{\text{Ba}}$                                |
| $\text{Ag}_2\text{MgGeS}_4$                              | Ordering I  | $\text{Mg}_S$                                                                                                                  |

Continued on next page

Table S3 – continued from previous page

| <b>Compound</b>                        | <b>Ordering</b> | <b>Defects Considered</b>                                                                                                                                                                                                                            |
|----------------------------------------|-----------------|------------------------------------------------------------------------------------------------------------------------------------------------------------------------------------------------------------------------------------------------------|
| $\text{Ag}_2\text{MgGeS}_4$            | Ordering II     | $\text{S}_i, \text{S}_{\text{Ag}}$                                                                                                                                                                                                                   |
| $\text{Ag}_2\text{MgGeSe}_4$           | Ordering I      | $\text{Mg}_{\text{Ge}}, \text{Se}_{\text{Ge}}, \text{Mg}_{\text{Se}}$                                                                                                                                                                                |
| $\text{Ag}_2\text{MgGeSe}_4$           | Ordering II     | $\text{Ge}_{\text{Se}}, \text{Mg}_{\text{Se}}, \text{V}_{\text{Ge}}$                                                                                                                                                                                 |
| $\text{Ag}_2\text{MgGeTe}_4$           | Ordering I      | $\text{Ge}_{\text{Te}}, \text{Ge}_i$                                                                                                                                                                                                                 |
| $\text{Ag}_2\text{MgGeTe}_4$           | Ordering II     | $\text{Te}_{\text{Ag}}, \text{Ge}_i, \text{Te}_{\text{Ge}}, \text{Mg}_i$                                                                                                                                                                             |
| $\text{Ag}_2\text{MgSnS}_4$            | Ordering I      | $\text{V}_{\text{Ag}}, \text{Ag}_i, \text{S}_i, \text{Mg}_i$                                                                                                                                                                                         |
| $\text{Ag}_2\text{MgSnSe}_4$           | Ordering I      | $\text{Ag}_{\text{Sn}}, \text{Mg}_{\text{Ag}}, \text{Sn}_{\text{Se}}$                                                                                                                                                                                |
| $\text{Ag}_2\text{MgSnSe}_4$           | Ordering II     | $\text{Sn}_{\text{Ag}}, \text{Se}_{\text{Mg}}$                                                                                                                                                                                                       |
| $\text{Ag}_2\text{MgZrS}_2\text{Se}_2$ | Ordering I      | $\text{V}_{\text{Ag}}, \text{S}_{\text{Ag}}, \text{Ag}_{\text{Zr}}, \text{S}_{\text{Zr}}, \text{S}_i, \text{Mg}_{\text{S}}, \text{Se}_{\text{Ag}}$                                                                                                   |
| $\text{Ag}_2\text{MgZrS}_2\text{Se}_2$ | Ordering II     | $\text{Se}_{\text{S}}$                                                                                                                                                                                                                               |
| $\text{Ag}_2\text{SrGeS}_4$            | Ordering II     | $\text{Sr}_i, \text{S}_{\text{Ge}}, \text{V}_{\text{Ge}}$                                                                                                                                                                                            |
| $\text{Ag}_2\text{SrSnS}_4$            | Ordering I      | $\text{V}_{\text{Sr}}, \text{Sr}_{\text{S}}, \text{V}_{\text{S}}$                                                                                                                                                                                    |
| $\text{Ag}_2\text{SrSnSe}_4$           | Ordering II     | $\text{Ag}_{\text{Se}}, \text{Se}_i$                                                                                                                                                                                                                 |
| $\text{Ag}_2\text{SrZrS}_2\text{SeTe}$ | Ordering II     | $\text{Zr}_{\text{Ag}}, \text{Ag}_{\text{Sr}}, \text{Zr}_{\text{Se}}, \text{V}_{\text{S}}, \text{V}_{\text{Se}}, \text{Te}_{\text{Sr}}, \text{Sr}_i, \text{S}_{\text{Se}},$<br>$\text{Te}_{\text{Ag}}, \text{Te}_{\text{Zr}}, \text{Te}_{\text{Se}}$ |
| $\text{Ag}_2\text{ZnGeS}_4$            | Ordering I      | $\text{Ag}_{\text{Zn}}$                                                                                                                                                                                                                              |
| $\text{Ag}_2\text{ZnGeS}_4$            | Ordering II     | $\text{V}_{\text{S}}, \text{Ag}_{\text{Zn}}$                                                                                                                                                                                                         |
| $\text{Ag}_2\text{ZnGeSe}_4$           | Ordering I      | $\text{Ag}_{\text{Zn}}, \text{Se}_{\text{Zn}}$                                                                                                                                                                                                       |
| $\text{Ag}_2\text{ZnSnS}_4$            | Ordering I      | $\text{Ag}_i, \text{Zn}_i$                                                                                                                                                                                                                           |

Continued on next page

Table S3 – continued from previous page

| Compound                                                                 | Ordering    | Defects Considered                                                                                                                   |
|--------------------------------------------------------------------------|-------------|--------------------------------------------------------------------------------------------------------------------------------------|
| $\text{Ag}_2\text{ZnSnSe}_4$                                             | Ordering I  | $\text{Zn}_{\text{Se}}$                                                                                                              |
| $\text{Ag}_2\text{ZnSnSe}_4$                                             | Ordering II | $\text{Se}_i$                                                                                                                        |
| $\text{Cs}_{0.5}\text{Ag}_{0.5}\text{Al}_{0.5}\text{In}_{0.5}\text{SSe}$ | Ordering II | $\text{S}_{\text{Cs}}, \text{V}_{\text{Cs}}, \text{V}_{\text{S}}, \text{V}_{\text{Ag}}, \text{Al}_{\text{Cs}}, \text{V}_{\text{In}}$ |
| $\text{Cs}_{0.5}\text{Ag}_{0.5}\text{Al}_{0.5}\text{In}_{0.5}\text{S}_2$ | Ordering I  | $\text{Al}_{\text{Ag}}, \text{S}_{\text{In}}, \text{Cs}_{\text{Ag}}, \text{Al}_i$                                                    |
| $\text{Cs}_{0.5}\text{Ag}_{0.5}\text{AlSSe}$                             | Ordering I  | $\text{Se}_{\text{Al}}, \text{V}_{\text{Al}}, \text{Ag}_{\text{Cs}}$                                                                 |
| $\text{Cs}_{0.5}\text{Ag}_{0.5}\text{AlSeTe}$                            | Ordering I  | $\text{Al}_{\text{Te}}, \text{Te}_i, \text{Cs}_{\text{Se}}$                                                                          |
| $\text{Cs}_{0.5}\text{Ag}_{0.5}\text{AlSeTe}$                            | Ordering II | $\text{Se}_{\text{Ag}}, \text{Al}_{\text{Se}}$                                                                                       |
| $\text{Cs}_{0.5}\text{Ag}_{0.5}\text{AlSe}_2$                            | Ordering I  | $\text{V}_{\text{Al}}, \text{Se}_i, \text{V}_{\text{Ag}}$                                                                            |
| $\text{Cs}_{0.5}\text{Ag}_{0.5}\text{AlTe}_2$                            | Ordering I  | $\text{Cs}_{\text{Ag}}, \text{Al}_i, \text{Te}_{\text{Cs}}$                                                                          |
| $\text{Cs}_{0.5}\text{Ag}_{1.5}\text{MgSnSe}_4$                          | Ordering I  | $\text{Mg}_{\text{Cs}}, \text{V}_{\text{Ag}}$                                                                                        |
| $\text{Cs}_{0.5}\text{Ag}_{1.5}\text{MgSnSe}_4$                          | Ordering II | $\text{V}_{\text{Se}}, \text{Se}_{\text{Cs}}, \text{Sn}_{\text{Cs}}, \text{Mg}_{\text{Ag}}$                                          |
| $\text{Cs}_{0.5}\text{Cu}_{0.5}\text{Al}_{0.5}\text{Ga}_{0.5}\text{SSe}$ | Ordering II | $\text{Cu}_{\text{Al}}, \text{V}_{\text{Cu}}, \text{V}_{\text{Se}}, \text{S}_{\text{Al}}$                                            |
| $\text{Cs}_{0.5}\text{Cu}_{0.5}\text{Al}_{0.5}\text{Ga}_{0.5}\text{S}_2$ | Ordering II | $\text{V}_{\text{Ga}}$                                                                                                               |
| $\text{Cs}_{0.5}\text{Cu}_{0.5}\text{AlSSe}$                             | Ordering I  | $\text{Al}_{\text{S}}$                                                                                                               |
| $\text{Cs}_{0.5}\text{Cu}_{0.5}\text{AlS}_2$                             | Ordering I  | $\text{CS}_{\text{S}}, \text{Al}_{\text{Cu}}$                                                                                        |
| $\text{Cs}_{0.5}\text{Cu}_{0.5}\text{AlTe}_2$                            | Ordering I  | $\text{CS}_{\text{Al}}, \text{CS}_{\text{Te}}$                                                                                       |
| $\text{Cs}_{0.5}\text{Cu}_{0.5}\text{AlTe}_2$                            | Ordering II | $\text{Te}_{\text{Cu}}, \text{Cu}_{\text{Te}}, \text{Al}_i, \text{V}_{\text{Al}}, \text{V}_{\text{Cu}}$                              |
| $\text{Cs}_{1.5}\text{Ag}_{0.5}\text{MgSnS}_2\text{Se}_2$                | Ordering I  | $\text{S}_i, \text{CS}_{\text{Sn}}, \text{CS}_{\text{Mg}}, \text{Ag}_{\text{Mg}}, \text{V}_{\text{Sn}}$                              |
| $\text{CsAl}_{0.5}\text{Ga}_{0.5}\text{Se}_2$                            | Ordering I  | $\text{V}_{\text{Se}}, \text{CS}_i, \text{Se}_i, \text{Ga}_{\text{Al}}$                                                              |

Continued on next page

Table S3 – continued from previous page

| <b>Compound</b>                                                                         | <b>Ordering</b> | <b>Defects Considered</b>                          |
|-----------------------------------------------------------------------------------------|-----------------|----------------------------------------------------|
| CsAlSeTe                                                                                | Ordering II     | $Al_{Te}$                                          |
| CsAlSe <sub>2</sub>                                                                     | Ordering I      | $V_{Cs}, Al_i$                                     |
| CsAlSe <sub>2</sub>                                                                     | Ordering II     | $V_{Se}$                                           |
| CsAlTe <sub>2</sub>                                                                     | Ordering I      | $Cs_i, Te_{Cs}, Cs_{Al}$                           |
| CsGaS <sub>2</sub>                                                                      | Ordering I      | $V_S$                                              |
| CsInS <sub>2</sub>                                                                      | Ordering I      | $S_{Cs}$                                           |
| Cs <sub>2</sub> MgSnSe <sub>4</sub>                                                     | Ordering I      | $Mg_i, Mg_{Se}$                                    |
| Cu <sub>0.5</sub> Ag <sub>0.5</sub> Al <sub>0.5</sub> In <sub>0.5</sub> SSe             | Ordering I      | $Al_S, S_{Al}, Cu_{Al}, In_{Se}, Al_{In}$          |
| Cu <sub>0.5</sub> Ag <sub>0.5</sub> Al <sub>0.5</sub> In <sub>0.5</sub> SSe             | Ordering II     | $V_{Al}, Cu_{Al}, S_{In}, Se_{In}, In_{Ag}$        |
| Cu <sub>0.5</sub> Ag <sub>0.5</sub> Al <sub>0.5</sub> In <sub>0.5</sub> STe             | Ordering I      | $V_{Al}, Al_S, S_{Cu}, Cu_{Al}$                    |
| Cu <sub>0.5</sub> Ag <sub>0.5</sub> Al <sub>0.5</sub> In <sub>0.5</sub> S <sub>2</sub>  | Ordering I      | $Ag_{Cu}, In_{Al}$                                 |
| Cu <sub>0.5</sub> Ag <sub>0.5</sub> Al <sub>0.5</sub> In <sub>0.5</sub> S <sub>2</sub>  | Ordering II     | $S_{Cu}, S_{In}, S_i, Cu_{Al}$                     |
| Cu <sub>0.5</sub> Ag <sub>0.5</sub> Al <sub>0.5</sub> In <sub>0.5</sub> Se <sub>2</sub> | Ordering II     | $Se_{Ag}, V_{In}, Se_i, Al_{Se}$                   |
| Cu <sub>0.5</sub> Ag <sub>0.5</sub> AlSTe                                               | Ordering I      | $Ag_{Te}, V_{Te}, Ag_{Cu}, V_S, S_{Te}, Te_i$      |
| Cu <sub>0.5</sub> Ag <sub>0.5</sub> AlSTe                                               | Ordering II     | $S_{Al}, Al_i$                                     |
| Cu <sub>0.5</sub> Ag <sub>0.5</sub> AlS <sub>2</sub>                                    | Ordering I      | $V_{Ag}, Ag_{Al}, V_{Al}$                          |
| Cu <sub>0.5</sub> Ag <sub>0.5</sub> AlS <sub>2</sub>                                    | Ordering II     | $Ag_{Al}, Ag_i, Ag_S, V_{Cu}, S_{Ag}$              |
| Cu <sub>0.5</sub> Ag <sub>0.5</sub> AlSeTe                                              | Ordering I      | $Al_{Se}, Cu_{Al}, V_{Te}$                         |
| Cu <sub>0.5</sub> Ag <sub>0.5</sub> AlSeTe                                              | Ordering II     | $Cu_{Te}, Te_{Se}, Te_i, V_{Al}, Ag_{Te}, Al_{Ag}$ |

Continued on next page

Table S3 – continued from previous page

| Compound                                                                            | Ordering    | Defects Considered                                                                                                                                                                    |
|-------------------------------------------------------------------------------------|-------------|---------------------------------------------------------------------------------------------------------------------------------------------------------------------------------------|
| $\text{Cu}_{0.5}\text{Ag}_{0.5}\text{AlSe}_2$                                       | Ordering I  | $V_{Se}, \text{Cu}_i, \text{Cu}_{Al}$                                                                                                                                                 |
| $\text{Cu}_{0.5}\text{Ag}_{0.5}\text{AlSe}_2$                                       | Ordering II | $\text{Se}_{Cu}, \text{Cu}_{Se}, \text{Cu}_{Al}, \text{Cu}_i, V_{Cu}, \text{Se}_i$                                                                                                    |
| $\text{Cu}_{0.5}\text{Ag}_{0.5}\text{AlTe}_2$                                       | Ordering I  | $\text{Ag}_{Te}, \text{Al}_{Ag}$                                                                                                                                                      |
| $\text{Cu}_{0.5}\text{Ag}_{0.5}\text{AlTe}_2$                                       | Ordering II | $\text{Te}_{Ag}$                                                                                                                                                                      |
| $\text{Cu}_{0.5}\text{Ag}_{0.5}\text{Ga}_{0.5}\text{In}_{0.5}\text{S}_2$            | Ordering I  | $S_{In}$                                                                                                                                                                              |
| $\text{Cu}_{0.5}\text{Ag}_{0.5}\text{Ga}_{0.5}\text{In}_{0.5}\text{S}_2$            | Ordering II | $\text{Ga}_S, \text{Cu}_{Ga}$                                                                                                                                                         |
| $\text{Cu}_{0.5}\text{Ag}_{0.5}\text{Ga}_{0.5}\text{In}_{0.5}\text{Se}_2$           | Ordering I  | $\text{Ag}_{Ga}, \text{Ag}_{Cu}, V_{Cu}, \text{Ag}_i$                                                                                                                                 |
| $\text{Cu}_{0.5}\text{Ag}_{0.5}\text{Ga}_{0.5}\text{In}_{0.5}\text{Se}_2$           | Ordering II | $\text{Ag}_{Ga}, \text{Ag}_i, \text{Ga}_i, \text{Ga}_{Cu}$                                                                                                                            |
| $\text{Cu}_{0.5}\text{Ag}_{0.5}\text{GaS}_2$                                        | Ordering I  | $\text{Ag}_{Ga}, S_{Cu}, \text{Cu}_{Ga}, \text{Cu}_{Ag}$                                                                                                                              |
| $\text{Cu}_{0.5}\text{Ag}_{0.5}\text{GaS}_2$                                        | Ordering II | $\text{Ag}_S, \text{Cu}_{Ga}$                                                                                                                                                         |
| $\text{Cu}_{0.5}\text{Ag}_{0.5}\text{GaSe}_2$                                       | Ordering I  | $V_{Ag}, \text{Se}_{Ga}$                                                                                                                                                              |
| $\text{Cu}_{0.5}\text{Ag}_{0.5}\text{GaSe}_2$                                       | Ordering II | $\text{Cu}_{Se}, \text{Cu}_{Ag}$                                                                                                                                                      |
| $\text{Cu}_{0.5}\text{Ag}_{0.5}\text{InS}_2$                                        | Ordering I  | $\text{In}_i, \text{Cu}_S$                                                                                                                                                            |
| $\text{Cu}_{0.5}\text{Ag}_{0.5}\text{InS}_2$                                        | Ordering II | $\text{Ag}_{Cu}$                                                                                                                                                                      |
| $\text{Cu}_{0.5}\text{Ag}_{1.5}\text{Zn}_{0.5}\text{Cd}_{0.5}\text{GeS}_3\text{Te}$ | Ordering I  | $\text{Cd}_{Zn}, \text{Te}_{Ge}, \text{Te}_S, \text{Ge}_{Ag}, \text{Ge}_{Te}, \text{Zn}_{Ag}, V_{Cd}, \text{Ge}_{Cd}, V_{Ag}, \text{Cu}_{Ag}, \text{Ge}_{Zn}, \text{Cd}_{Te}, S_{Cd}$ |
| $\text{Cu}_{1.5}\text{Ag}_{0.5}\text{BaSnS}_4$                                      | Ordering I  | $\text{Ag}_i, \text{Ag}_S, S_{Cu}, \text{Ba}_{Sn}, \text{Ba}_S$                                                                                                                       |
| $\text{Cu}_{1.5}\text{Ag}_{0.5}\text{BaSnS}_4$                                      | Ordering II | $V_{Ag}, \text{Cu}_{Ag}, \text{Cu}_{Ba}$                                                                                                                                              |
| $\text{CuAl}_{0.5}\text{Ga}_{0.5}\text{S}_2$                                        | Ordering I  | $V_{Al}, \text{Ga}_{Al}, S_i$                                                                                                                                                         |

Continued on next page

Table S3 – continued from previous page

| <b>Compound</b>                               | <b>Ordering</b> | <b>Defects Considered</b>                                                                  |
|-----------------------------------------------|-----------------|--------------------------------------------------------------------------------------------|
| $\text{CuAl}_{0.5}\text{Ga}_{0.5}\text{Te}_2$ | Ordering I      | $\text{Ga}_{\text{Te}}, \text{Al}_{\text{Te}}, \text{V}_{\text{Cu}}, \text{V}_{\text{Al}}$ |
| $\text{CuAl}_{0.5}\text{In}_{0.5}\text{S}_2$  | Ordering I      | $\text{S}_{\text{Cu}}, \text{S}_{\text{In}}, \text{In}_{\text{Cu}}$                        |
| $\text{CuAl}_{0.5}\text{In}_{0.5}\text{S}_2$  | Ordering II     | $\text{In}_{\text{Cu}}$                                                                    |
| $\text{CuAl}_{0.5}\text{In}_{0.5}\text{Se}_2$ | Ordering I      | $\text{V}_{\text{Cu}}, \text{Se}_{\text{Al}}$                                              |
| $\text{CuAl}_{0.5}\text{In}_{0.5}\text{Se}_2$ | Ordering II     | $\text{V}_{\text{Se}}$                                                                     |
| $\text{CuAlSTe}$                              | Ordering I      | $\text{Al}_{\text{Cu}}$                                                                    |
| $\text{CuAlSTe}$                              | Ordering II     | $\text{S}_{\text{Al}}, \text{Te}_{\text{S}}, \text{V}_{\text{S}}$                          |
| $\text{CuAlS}_2$                              | Ordering I      | $\text{Cu}_i, \text{V}_{\text{Cu}}$                                                        |
| $\text{CuAlS}_2$                              | Ordering II     | $\text{Al}_i, \text{Al}_{\text{Cu}}$                                                       |
| $\text{CuAlSeTe}$                             | Ordering I      | $\text{Al}_{\text{Cu}}, \text{Cu}_i, \text{Te}_{\text{Al}}$                                |
| $\text{CuAlSeTe}$                             | Ordering II     | $\text{Te}_{\text{Se}}$                                                                    |
| $\text{CuAlSe}_2$                             | Ordering I      | $\text{Cu}_{\text{Al}}, \text{Al}_{\text{Se}}$                                             |
| $\text{CuAlSe}_2$                             | Ordering II     | $\text{Se}_i, \text{Se}_{\text{Cu}}, \text{V}_{\text{Se}}$                                 |
| $\text{CuAlTe}_2$                             | Ordering I      | $\text{Cu}_{\text{Al}}$                                                                    |
| $\text{CuAlTe}_2$                             | Ordering II     | $\text{Te}_{\text{Cu}}, \text{Al}_{\text{Cu}}, \text{V}_{\text{Cu}}$                       |
| $\text{CuGa}_{0.5}\text{In}_{0.5}\text{S}_2$  | Ordering I      | $\text{V}_{\text{Cu}}, \text{V}_{\text{Ga}}, \text{S}_{\text{Ga}}, \text{V}_{\text{S}}$    |
| $\text{CuGa}_{0.5}\text{In}_{0.5}\text{S}_2$  | Ordering II     | $\text{In}_{\text{S}}, \text{Cu}_i$                                                        |
| $\text{CuGa}_{0.5}\text{In}_{0.5}\text{Se}_2$ | Ordering II     | $\text{Se}_{\text{Cu}}, \text{In}_{\text{Se}}$                                             |
| $\text{CuGaSSe}$                              | Ordering II     | $\text{Cu}_{\text{Ga}}, \text{V}_{\text{Cu}}$                                              |

Continued on next page

Table S3 – continued from previous page

| Compound                                                               | Ordering    | Defects Considered                           |
|------------------------------------------------------------------------|-------------|----------------------------------------------|
| CuGaSTe                                                                | Ordering I  | $Ga_i, Cu_S, Cu_i, V_{Te}$                   |
| CuGaS <sub>2</sub>                                                     | Ordering I  | $Cu_{Ga}, Ga_S$                              |
| CuGaS <sub>2</sub>                                                     | Ordering II | $V_S$                                        |
| CuGaSeTe                                                               | Ordering I  | $Te_i, Ga_{Te}$                              |
| CuGaSeTe                                                               | Ordering II | $Se_{Cu}, Cu_{Te}, Te_{Ga}, Ga_{Se}, V_{Cu}$ |
| CuGaSe <sub>2</sub>                                                    | Ordering I  | $Se_{Cu}$                                    |
| CuInSSe                                                                | Ordering II | $S_{Se}, Se_{Cu}$                            |
| CuInS <sub>2</sub>                                                     | Ordering I  | $Cu_i$                                       |
| CuInS <sub>2</sub>                                                     | Ordering II | $In_{Cu}$                                    |
| CuInSe <sub>2</sub>                                                    | Ordering I  | $Se_{Cu}$                                    |
| CuInSe <sub>2</sub>                                                    | Ordering II | $Cu_{In}$                                    |
| Cu <sub>2</sub> BaGeS <sub>4</sub>                                     | Ordering I  | $S_i$                                        |
| Cu <sub>2</sub> BaSn <sub>0.25</sub> Zr <sub>0.75</sub> S <sub>4</sub> | Ordering II | $Ba_S, Zr_{Sn}, Ba_{Sn}, Cu_S$               |
| Cu <sub>2</sub> BaSn <sub>0.5</sub> Zr <sub>0.5</sub> S <sub>4</sub>   | Ordering II | $V_{Sn}, S_{Sn}$                             |
| Cu <sub>2</sub> BaSn <sub>0.75</sub> Zr <sub>0.25</sub> S <sub>4</sub> | Ordering II | $V_{Cu}, Zr_{Ba}, Cu_S, Ba_{Sn}$             |
| Cu <sub>2</sub> BaZrS <sub>2</sub> Se <sub>2</sub>                     | Ordering II | $Zr_{Se}, Zr_{Ba}, Cu_{Zr}$                  |
| Cu <sub>2</sub> BaZrS <sub>4</sub>                                     | Ordering I  | $S_{Zr}, S_{Cu}$                             |
| Cu <sub>2</sub> BaZrS <sub>4</sub>                                     | Ordering II | $Zr_{Ba}, V_{Ba}, S_i$                       |
| Cu <sub>2</sub> BaZrSe <sub>4</sub>                                    | Ordering II | $Ba_{Zr}, Ba_{Cu}$                           |

Continued on next page

Table S3 – continued from previous page

| <b>Compound</b>                                          | <b>Ordering</b> | <b>Defects Considered</b>                                                     |
|----------------------------------------------------------|-----------------|-------------------------------------------------------------------------------|
| $\text{Cu}_2\text{CaGeS}_4$                              | Ordering II     | $S_{Cu}, V_S, S_i$                                                            |
| $\text{Cu}_2\text{CaGeSe}_4$                             | Ordering II     | $\text{Cu}_{Ge}, \text{Ca}_{Ge}$                                              |
| $\text{Cu}_2\text{CaSnS}_4$                              | Ordering II     | $V_{Ca}, \text{Cu}_S$                                                         |
| $\text{Cu}_2\text{CdGeS}_2\text{Te}_2$                   | Ordering II     | $\text{Te}_S, V_{Cd}, \text{Cu}_S, V_S$                                       |
| $\text{Cu}_2\text{CdGeS}_4$                              | Ordering II     | $V_S$                                                                         |
| $\text{Cu}_2\text{CdGeSe}_4$                             | Ordering II     | $V_{Cd}$                                                                      |
| $\text{Cu}_2\text{CdSnS}_2\text{Se}_2$                   | Ordering I      | $S_{Se}, \text{Sn}_{Se}, \text{Cd}_i, \text{Se}_{Sn}, \text{Se}_{Cd}$         |
| $\text{Cu}_2\text{CdSnS}_2\text{Se}_2$                   | Ordering II     | $\text{Cd}_{Sn}, \text{Cu}_{Sn}$                                              |
| $\text{Cu}_2\text{CdSnS}_4$                              | Ordering I      | $S_{Sn}, \text{Cu}_i, \text{Cu}_{Cd}, S_{Cu}$                                 |
| $\text{Cu}_2\text{CdSnSe}_4$                             | Ordering I      | $V_{Cu}, \text{Cd}_{Sn}, \text{Se}_{Cd}, \text{Sn}_i$                         |
| $\text{Cu}_2\text{Mg}_{0.5}\text{Ca}_{0.5}\text{SnS}_4$  | Ordering I      | $\text{Mg}_{Cu}, V_{Sn}$                                                      |
| $\text{Cu}_2\text{Mg}_{0.5}\text{Ca}_{0.5}\text{SnS}_4$  | Ordering II     | $\text{Mg}_{Ca}, \text{Ca}_S, V_{Sn}$                                         |
| $\text{Cu}_2\text{Mg}_{0.5}\text{Ca}_{0.5}\text{SnSe}_4$ | Ordering II     | $\text{Cu}_{Se}, \text{Ca}_{Cu}, \text{Mg}_{Cu}, \text{Sn}_{Cu}, \text{Se}_i$ |
| $\text{Cu}_2\text{Mg}_{0.5}\text{Sr}_{0.5}\text{ZrSe}_4$ | Ordering I      | $\text{Mg}_{Cu}, \text{Sr}_{Cu}$                                              |
| $\text{Cu}_2\text{Mg}_{0.5}\text{Sr}_{0.5}\text{ZrSe}_4$ | Ordering II     | $\text{Mg}_i, \text{Sr}_{Zr}, \text{Mg}_{Sr}$                                 |
| $\text{Cu}_2\text{MgGeS}_4$                              | Ordering I      | $S_{Mg}, \text{Cu}_{Mg}, \text{Mg}_i$                                         |
| $\text{Cu}_2\text{MgGeS}_4$                              | Ordering II     | $\text{Cu}_i, S_i, \text{Mg}_i, \text{Ge}_{Cu}, \text{Mg}_{Cu}$               |
| $\text{Cu}_2\text{MgGeSe}_4$                             | Ordering I      | $V_{Cu}, \text{Cu}_{Ge}, V_{Ge}, \text{Se}_{Ge}$                              |
| $\text{Cu}_2\text{MgGeTe}_4$                             | Ordering II     | $\text{Te}_{Ge}, V_{Cu}$                                                      |

Continued on next page

Table S3 – continued from previous page

| Compound                               | Ordering    | Defects Considered                                                                                            |
|----------------------------------------|-------------|---------------------------------------------------------------------------------------------------------------|
| $\text{Cu}_2\text{MgSnSSe}_3$          | Ordering I  | $S_i, \text{Cu}_{Se}, \text{Mg}_{Sn}, S_{Cu}, \text{Mg}_i, \text{Se}_{Cu}, \text{Cu}_{Sn}$                    |
| $\text{Cu}_2\text{MgSnSTe}_3$          | Ordering II | $S_{Sn}, \text{Mg}_{Te}, \text{Te}_{Cu}, S_i, V_{Sn}, V_S$                                                    |
| $\text{Cu}_2\text{MgSnS}_2\text{Se}_2$ | Ordering I  | $V_S, S_{Sn}, \text{Mg}_{Se}, \text{Cu}_S$                                                                    |
| $\text{Cu}_2\text{MgSnS}_2\text{Te}_2$ | Ordering II | $\text{Mg}_S, S_{Sn}, \text{Mg}_i, V_S$                                                                       |
| $\text{Cu}_2\text{MgSnS}_3\text{Se}$   | Ordering I  | $\text{Cu}_{Se}, \text{Sn}_i, V_S, \text{Sn}_{Cu}$                                                            |
| $\text{Cu}_2\text{MgSnS}_3\text{Te}$   | Ordering II | $S_i, \text{Cu}_{Se}, \text{Mg}_S, \text{Cu}_S$                                                               |
| $\text{Cu}_2\text{MgSnS}_4$            | Ordering I  | $S_{Mg}, S_{Cu}$                                                                                              |
| $\text{Cu}_2\text{MgSnS}_4$            | Ordering II | $V_{Cu}, S_{Cu}$                                                                                              |
| $\text{Cu}_2\text{MgSnSe}_4$           | Ordering I  | $\text{Se}_{Cu}, \text{Se}_{Sn}, \text{Cu}_i$                                                                 |
| $\text{Cu}_2\text{MgSnSe}_4$           | Ordering II | $\text{Mg}_{Cu}, \text{Se}_{Cu}, V_{Mg}$                                                                      |
| $\text{Cu}_2\text{MgZrTe}_4$           | Ordering I  | $\text{Cu}_{Zr}$                                                                                              |
| $\text{Cu}_2\text{MgZrTe}_4$           | Ordering II | $\text{Mg}_i, V_{Te}, \text{Te}_{Zr}, \text{Mg}_{Zr}$                                                         |
| $\text{Cu}_2\text{SrGeS}_4$            | Ordering I  | $\text{Cu}_S$                                                                                                 |
| $\text{Cu}_2\text{SrGeS}_4$            | Ordering II | $V_S, S_{Ge}, \text{Ge}_{Cu}, \text{Cu}_{Sr}, S_{Cu}$                                                         |
| $\text{Cu}_2\text{SrGeSe}_4$           | Ordering II | $\text{Se}_{Cu}, \text{Cu}_i$                                                                                 |
| $\text{Cu}_2\text{SrSnS}_4$            | Ordering II | $\text{Sr}_S$                                                                                                 |
| $\text{Cu}_2\text{ZnGeS}_2\text{SeTe}$ | Ordering I  | $\text{Te}_i, S_{Ge}, \text{Te}_{Se}, \text{Ge}_{Se}, \text{Te}_{Zn}, \text{Se}_{Zn}, V_{Zn}, \text{Cu}_{Te}$ |
| $\text{Cu}_2\text{ZnGeS}_4$            | Ordering I  | $\text{Ge}_S$                                                                                                 |

Continued on next page

Table S3 – continued from previous page

| Compound                                                             | Ordering    | Defects Considered                                                               |
|----------------------------------------------------------------------|-------------|----------------------------------------------------------------------------------|
| $\text{Cu}_2\text{ZnGeSe}_4$                                         | Ordering II | $V_{Se}$                                                                         |
| $\text{Cu}_2\text{ZnSn}_{0.25}\text{Zr}_{0.75}\text{S}_2\text{Se}_2$ | Ordering II | $\text{Se}_{Zr}, \text{S}_{Zn}, \text{Sn}_{Zn}, \text{S}_{Se}$                   |
| $\text{Cu}_2\text{ZnSn}_{0.25}\text{Zr}_{0.75}\text{S}_4$            | Ordering II | $V_{Zn}, \text{S}_{Zn}$                                                          |
| $\text{Cu}_2\text{ZnSn}_{0.5}\text{Zr}_{0.5}\text{S}_2\text{Se}_2$   | Ordering I  | $\text{Sn}_{Zr}, \text{Se}_{Zr}, V_S, \text{Zr}_{Cu}$                            |
| $\text{Cu}_2\text{ZnSn}_{0.5}\text{Zr}_{0.5}\text{S}_2\text{Se}_2$   | Ordering II | $\text{Zr}_{Sn}, \text{S}_i, \text{Zr}_{Cu}, V_{Zr}$                             |
| $\text{Cu}_2\text{ZnSn}_{0.5}\text{Zr}_{0.5}\text{S}_4$              | Ordering I  | $\text{S}_{Zr}, V_{Cu}, \text{Zn}_{Sn}, V_{Sn}, V_{Zr}$                          |
| $\text{Cu}_2\text{ZnSn}_{0.5}\text{Zr}_{0.5}\text{S}_4$              | Ordering II | $\text{Zr}_i, \text{Zn}_{Sn}, \text{Zr}_{Cu}$                                    |
| $\text{Cu}_2\text{ZnSn}_{0.5}\text{Zr}_{0.5}\text{Se}_4$             | Ordering I  | $\text{Se}_{Sn}, V_{Sn}, \text{Sn}_{Cu}, V_{Se}, \text{Cu}_{Zn}, \text{Sn}_{Zn}$ |
| $\text{Cu}_2\text{ZnSn}_{0.5}\text{Zr}_{0.5}\text{Se}_4$             | Ordering II | $\text{Se}_{Zn}$                                                                 |
| $\text{Cu}_2\text{ZnSn}_{0.75}\text{Zr}_{0.25}\text{S}_2\text{Se}_2$ | Ordering I  | $\text{Zn}_{Cu}, \text{Zn}_{Se}, V_{Cu}, \text{S}_{Zn}$                          |
| $\text{Cu}_2\text{ZnSn}_{0.75}\text{Zr}_{0.25}\text{S}_4$            | Ordering I  | $\text{Cu}_S, \text{Zr}_{Zn}$                                                    |
| $\text{Cu}_2\text{ZnSn}_{0.75}\text{Zr}_{0.25}\text{S}_4$            | Ordering II | $\text{Cu}_i, \text{Sn}_{Zn}$                                                    |
| $\text{Cu}_2\text{ZnSn}_{0.75}\text{Zr}_{0.25}\text{Se}_4$           | Ordering I  | $\text{Cu}_{Zn}, V_{Zn}$                                                         |
| $\text{Cu}_2\text{ZnSn}_{0.75}\text{Zr}_{0.25}\text{Se}_4$           | Ordering II | $\text{Sn}_{Zn}, \text{Se}_{Zr}$                                                 |
| $\text{Cu}_2\text{ZnSnS}_2\text{Se}_2$                               | Ordering I  | $\text{Zn}_{Se}, \text{Se}_{Zn}, \text{Cu}_{Se}$                                 |
| $\text{Cu}_2\text{ZnSnS}_2\text{Se}_2$                               | Ordering II | $\text{S}_{Se}, \text{Se}_{Sn}, V_{Sn}, \text{Cu}_i$                             |
| $\text{Cu}_2\text{ZnSnS}_4$                                          | Ordering I  | $\text{Zn}_S, \text{Sn}_S, \text{S}_{Zn}, \text{Cu}_{Zn}$                        |
| $\text{Cu}_2\text{ZnSnS}_4$                                          | Ordering II | $\text{Zn}_{Sn}, \text{Zn}_{Cu}, \text{Sn}_{Cu}, V_{Cu}$                         |
| $\text{Cu}_2\text{ZnSnSe}_4$                                         | Ordering I  | $\text{Cu}_i, \text{Sn}_{Se}, \text{Sn}_{Cu}$                                    |

Continued on next page

Table S3 – continued from previous page

| <b>Compound</b>                                                         | <b>Ordering</b> | <b>Defects Considered</b>                                                                                         |
|-------------------------------------------------------------------------|-----------------|-------------------------------------------------------------------------------------------------------------------|
| $\text{Cu}_2\text{ZnSnSe}_4$                                            | Ordering II     | $V_{Se}, \text{Sn}_{Se}$                                                                                          |
| $\text{Cu}_2\text{ZnZrS}_2\text{Se}_2$                                  | Ordering I      | $\text{Se}_i, \text{Se}_{Cu}$                                                                                     |
| $\text{Cu}_2\text{ZnZrS}_4$                                             | Ordering I      | $\text{Cu}_{Zn}$                                                                                                  |
| $\text{Cu}_2\text{ZnZrS}_4$                                             | Ordering II     | $\text{Zn}_{Zr}, V_S, S_{Zn}, \text{Zn}_i, S_{Cu}, \text{Zr}_S$                                                   |
| $\text{Cu}_2\text{ZnZrSe}_4$                                            | Ordering I      | $\text{Zr}_{Se}$                                                                                                  |
| $\text{Cu}_2\text{ZnZrSe}_4$                                            | Ordering II     | $V_{Se}, \text{Se}_{Zn}, \text{Se}_{Cu}$                                                                          |
| $\text{K}_{0.5}\text{Ag}_{0.5}\text{Al}_{0.5}\text{Ga}_{0.5}\text{STe}$ | Ordering I      | $\text{Te}_S, S_{Al}, \text{Ga}_{Ag}$                                                                             |
| $\text{K}_{0.5}\text{Ag}_{0.5}\text{Al}_{0.5}\text{In}_{0.5}\text{S}_2$ | Ordering I      | $S_{Al}, \text{Al}_S, \text{Al}_K$                                                                                |
| $\text{K}_{0.5}\text{Ag}_{0.5}\text{AlSTe}$                             | Ordering I      | $S_{Ag}, \text{Ag}_K, \text{Al}_i, \text{Al}_{Te}, S_{Te}$                                                        |
| $\text{K}_{0.5}\text{Ag}_{0.5}\text{AlSTe}$                             | Ordering II     | $S_{Al}, V_S$                                                                                                     |
| $\text{K}_{0.5}\text{Ag}_{0.5}\text{AlS}_2$                             | Ordering I      | $\text{Al}_{Ag}$                                                                                                  |
| $\text{K}_{0.5}\text{Ag}_{0.5}\text{AlSeTe}$                            | Ordering I      | $\text{K}_{Te}, \text{Al}_{Te}, \text{Al}_{Ag}, \text{Te}_{Al}, V_K, \text{Te}_i, \text{Te}_{Se}, \text{Se}_{Te}$ |
| $\text{K}_{0.5}\text{Ag}_{0.5}\text{AlSeTe}$                            | Ordering II     | $\text{Se}_{Ag}$                                                                                                  |
| $\text{K}_{0.5}\text{Ag}_{0.5}\text{AlSe}_2$                            | Ordering I      | $\text{Ag}_{Al}$                                                                                                  |
| $\text{K}_{0.5}\text{Ag}_{0.5}\text{AlSe}_2$                            | Ordering II     | $V_K, V_{Ag}, V_{Se}$                                                                                             |
| $\text{K}_{0.5}\text{Ag}_{0.5}\text{AlTe}_2$                            | Ordering I      | $\text{K}_i, \text{Al}_{Ag}, \text{Te}_K$                                                                         |
| $\text{K}_{0.5}\text{Ag}_{0.5}\text{AlTe}_2$                            | Ordering II     | $\text{Te}_K, \text{Ag}_i, V_{Al}$                                                                                |
| $\text{K}_{0.5}\text{Ag}_{0.5}\text{Ga}_{0.5}\text{In}_{0.5}\text{SSe}$ | Ordering I      | $\text{In}_S, \text{K}_S, \text{In}_i, \text{Ga}_{Se}, \text{Ag}_{Se}, \text{Se}_{In}, S_{In}$                    |
| $\text{K}_{0.5}\text{Ag}_{0.5}\text{GaS}_2$                             | Ordering I      | $\text{Ag}_S, V_S, S_K$                                                                                           |

Continued on next page

Table S3 – continued from previous page

| Compound                                  | Ordering    | Defects Considered                                   |
|-------------------------------------------|-------------|------------------------------------------------------|
| $K_{0.5}Ag_{0.5}GaS_2$                    | Ordering II | $S_{Ga}, K_{Ga}, V_K, K_i$                           |
| $K_{0.5}Ag_{1.5}SrZrS_4$                  | Ordering I  | $Sr_i, Ag_i, Zr_K$                                   |
| $K_{0.5}Ag_{1.5}SrZrS_4$                  | Ordering II | $S_{Sr}, Ag_S$                                       |
| $K_{0.5}Cs_{0.5}Al_{0.5}Ga_{0.5}STe$      | Ordering I  | $Cs_K, V_K, S_K, Te_{Al}, Cs_{Te}, Te_K$             |
| $K_{0.5}Cs_{0.5}Al_{0.5}In_{0.5}SSe$      | Ordering I  | $V_{Se}, Cs_{In}, K_i, S_{In}, S_{Se}$               |
| $K_{0.5}Cs_{0.5}Al_{0.5}In_{0.5}SSe$      | Ordering II | $K_i, K_{Al}, K_S, Cs_{Al}, Cs_i, V_{Se}, In_{Cs}$   |
| $K_{0.5}Cs_{0.5}AlSe_2$                   | Ordering I  | $K_i, Al_{Se}$                                       |
| $K_{0.5}Cs_{0.5}AlTe_2$                   | Ordering I  | $Al_{Te}$                                            |
| $K_{0.5}Cs_{0.5}AlTe_2$                   | Ordering II | $Cs_K, K_i$                                          |
| $K_{0.5}CsAg_{0.5}MgGeSe_4$               | Ordering I  | $V_{Cs}, Se_{Ge}, Cs_{Ag}, Ge_{Cs}, Mg_i$            |
| $K_{0.5}Cu_{0.5}AgCdGeS_4$                | Ordering II | $Cu_K, Cd_i, Cd_{Ag}, V_S, K_{Ge}$                   |
| $K_{0.5}Cu_{0.5}AgMg_{0.5}Zn_{0.5}GeSe_4$ | Ordering I  | $Ge_{Se}, Mg_{Zn}, Ge_{Cu}, Cu_{Mg}, Mg_K, Se_{Ag}$  |
| $K_{0.5}Cu_{0.5}AgMg_{0.5}Zn_{0.5}GeSe_4$ | Ordering II | $K_{Ag}, Se_{Ge}, Mg_K, Zn_{Cu}$                     |
| $K_{0.5}Cu_{0.5}Al_{0.5}Ga_{0.5}SSe$      | Ordering I  | $Al_S, Ga_i, Se_{Ga}, Ga_K, Al_{Se}$                 |
| $K_{0.5}Cu_{0.5}Al_{0.5}Ga_{0.5}SSe$      | Ordering II | $V_S, Cu_{Se}, Al_{Ga}, Ga_K, S_{Ga}, Se_{Cu}$       |
| $K_{0.5}Cu_{0.5}Al_{0.5}Ga_{0.5}S_2$      | Ordering II | $Ga_{Al}, Cu_{Al}, K_{Al}$                           |
| $K_{0.5}Cu_{0.5}Al_{0.5}Ga_{0.5}SeTe$     | Ordering I  | $Ga_{Cu}, V_{Ga}, K_{Ga}, Te_{Se}, Te_{Ga}, Te_{Al}$ |
| $K_{0.5}Cu_{0.5}Al_{0.5}Ga_{0.5}Se_2$     | Ordering I  | $K_{Se}, V_{Se}, Al_i, Al_{Ga}$                      |
| $K_{0.5}Cu_{0.5}Al_{0.5}Ga_{0.5}Se_2$     | Ordering II | $K_{Se}, V_{Cu}, Se_{Cu}, Se_K, Ga_i, Se_{Al}$       |

Continued on next page

Table S3 – continued from previous page

| Compound                                    | Ordering    | Defects Considered                                                                         |
|---------------------------------------------|-------------|--------------------------------------------------------------------------------------------|
| $K_{0.5}Cu_{0.5}Al_{0.5}In_{0.5}S_2$        | Ordering I  | $K_{Al}, Al_{Cu}, In_K, In_{Cu}$                                                           |
| $K_{0.5}Cu_{0.5}Al_{0.5}In_{0.5}S_2$        | Ordering II | $S_{Al}, Cu_S$                                                                             |
| $K_{0.5}Cu_{0.5}AlS_2$                      | Ordering I  | $Al_i, Al_S, K_S, S_K, K_{Cu}$                                                             |
| $K_{0.5}Cu_{0.5}AlS_2$                      | Ordering II | $K_S, S_i$                                                                                 |
| $K_{0.5}Cu_{0.5}AlSe_2$                     | Ordering I  | $V_{Se}, V_K, V_{Cu}, K_{Se}, Se_{Cu}, V_{Al}, Al_{Se}$                                    |
| $K_{0.5}Cu_{0.5}AlSe_2$                     | Ordering II | $K_{Cu}, V_{Al}, V_{Cu}$                                                                   |
| $K_{0.5}Cu_{0.5}AlTe_2$                     | Ordering I  | $Al_{Te}, Te_K, V_{Cu}$                                                                    |
| $K_{0.5}Cu_{0.5}AlTe_2$                     | Ordering II | $Cu_{Te}, K_{Cu}, Te_K$                                                                    |
| $K_{0.5}Cu_{0.5}GaS_2$                      | Ordering I  | $Cu_i$                                                                                     |
| $K_{0.5}Cu_{0.5}GaS_2$                      | Ordering II | $V_{Cu}, Cu_K$                                                                             |
| $K_{0.5}Cu_{1.5}ZnGeS_4$                    | Ordering II | $Zn_{Cu}, S_{Cu}$                                                                          |
| $K_{0.5}CuAg_{0.5}CdZrS_4$                  | Ordering I  | $Cd_K, K_i, Ag_S, V_{Cd}, Cu_{Zr}$                                                         |
| $K_{0.5}CuAg_{0.5}Mg_{0.5}Ca_{0.5}SnS_4$    | Ordering II | $S_{Cu}, V_{Mg}, Mg_{Ca}, Ca_S, K_{Cu}, Ca_i, K_S, Cu_K, V_{Cu}$                           |
| $K_{0.5}Rb_{0.5}AgMg_{0.5}Zn_{0.5}GeS_3Te$  | Ordering I  | $V_K, Rb_i, V_{Rb}, Zn_S, Rb_S, Te_{Ge}, Ge_{Rb}, Mg_{Zn}, Ge_K, Mg_i, Ge_{Zn}, Zn_i$      |
| $K_{0.5}Rb_{0.5}AgMg_{0.5}Zn_{0.5}GeSe_3Te$ | Ordering I  | $Zn_i, Rb_{Se}, Zn_K, Se_i, Te_K, V_K, Ge_i$                                               |
| $K_{0.5}Rb_{0.5}AgMgGeS_4$                  | Ordering I  | $Ag_i, S_{Mg}, S_{Ag}, Ge_K, Ag_K, Ge_i, K_S, Rb_i, Ge_{Mg}, K_{Mg}, V_{Rb}, K_i, Mg_{Rb}$ |

Continued on next page

Table S3 – continued from previous page

| <b>Compound</b>                           | <b>Ordering</b> | <b>Defects Considered</b>                                                                                                                         |
|-------------------------------------------|-----------------|---------------------------------------------------------------------------------------------------------------------------------------------------|
| $K_{0.5}Rb_{0.5}AgMgGeS_4$                | Ordering II     | $V_{Rb}, V_{Ge}, Mg_K$                                                                                                                            |
| $K_{0.5}Rb_{0.5}AgZnGeS_4$                | Ordering I      | $S_{Zn}, Ge_S, Ag_{Ge}, Rb_{Zn}, K_{Ag}$                                                                                                          |
| $K_{0.5}Rb_{0.5}AgZnGeS_4$                | Ordering II     | $Ag_S, Ag_i, Rb_{Ag}, S_{Rb}, K_{Ge}$                                                                                                             |
| $K_{0.5}Rb_{0.5}Al_{0.5}Ga_{0.5}Se_2$     | Ordering II     | $Ga_i, Se_i, Se_{Ga}$                                                                                                                             |
| $K_{0.5}Rb_{0.5}AlS_2$                    | Ordering I      | $S_i$                                                                                                                                             |
| $K_{0.5}Rb_{0.5}AlSeTe$                   | Ordering I      | $Al_K, Te_K, Al_{Se}, V_{Te}$                                                                                                                     |
| $K_{0.5}Rb_{0.5}AlSeTe$                   | Ordering II     | $Rb_{Al}, K_{Al}, V_{Se}$                                                                                                                         |
| $K_{0.5}Rb_{0.5}AlSe_2$                   | Ordering I      | $Al_{Se}$                                                                                                                                         |
| $K_{0.5}Rb_{0.5}AlSe_2$                   | Ordering II     | $Se_K, Al_{Rb}$                                                                                                                                   |
| $K_{0.5}Rb_{0.5}AlTe_2$                   | Ordering I      | $V_{Rb}, K_{Rb}, Al_{Rb}$                                                                                                                         |
| $K_{0.5}Rb_{0.5}AlTe_2$                   | Ordering II     | $Rb_{Al}$                                                                                                                                         |
| $K_{0.5}Rb_{0.5}Cs_{0.5}Ag_{0.5}MgSnSe_4$ | Ordering I      | $Sn_{Rb}, Mg_{Cs}, V_{Mg}, Rb_{Cs}, Rb_{Sn}, Cs_{Mg}, Rb_i,$<br>$Sn_K, Cs_{Rb}, K_{Mg}, V_{Sn}, Ag_{Mg}, Se_{Sn}, Rb_{Mg},$<br>$Ag_{Sn}, Se_{Cs}$ |
| $K_{0.5}Rb_{0.5}Cs_{0.5}Ag_{0.5}MgZrS_4$  | Ordering I      | $S_{Cs}, Rb_S, Mg_i, Ag_{Mg}, Rb_K, Cs_i, Rb_{Cs}$                                                                                                |
| $K_{0.5}Rb_{0.5}Cs_{0.5}Ag_{0.5}MgZrS_4$  | Ordering II     | $K_S, S_{Ag}, Ag_{Rb}, K_{Mg}, Rb_i, K_i, V_S, Ag_K,$<br>$S_{Mg}, V_{Mg}, Zr_S$                                                                   |
| $K_{0.5}Rb_{0.5}Cs_{0.5}Ag_{0.5}MgZrSe_4$ | Ordering I      | $Rb_K, Zr_{Cs}, V_{Zr}, Zr_{Mg}, Mg_{Zr}, Rb_{Se}$                                                                                                |
| $K_{0.5}Rb_{0.5}Cs_{0.5}Ag_{0.5}MgZrSe_4$ | Ordering II     | $V_{Se}, Se_{Cs}, Se_{Zr}, Cs_{Ag}, Rb_{Mg}, Rb_{Ag}, Ag_{Rb}$                                                                                    |

Continued on next page

Table S3 – continued from previous page

| Compound                                 | Ordering    | Defects Considered                                                  |
|------------------------------------------|-------------|---------------------------------------------------------------------|
| $K_{0.5}Rb_{0.5}Cs_{0.5}Ag_{0.5}ZnGeS_4$ | Ordering I  | $V_{Ag}, Zn_i, Ge_{Ag}, Rb_i, Ag_{Zn}, Ge_S, Rb_S, Ag_{Ge}, V_{Cs}$ |
| $K_{0.5}Rb_{0.5}Cs_{0.5}Ag_{0.5}ZnGeS_4$ | Ordering II | $Rb_{Zn}, Ge_i, Ge_{Rb}, Ag_K, Zn_{Cs}, Cs_S$                       |
| $K_{0.5}Rb_{0.5}CsZnZrS_4$               | Ordering I  | $Zn_i, Cs_S, Rb_K, V_{Cs}, K_{Cs}, V_{Zr}, V_{Zn}, K_{Zn}$          |
| $K_{0.5}Rb_{0.5}Cu_{0.5}Ag_{0.5}MgGeS_4$ | Ordering II | $Mg_K, Ge_{Ag}, Cu_{Mg}, Cu_{Ag}, V_K, Mg_{Rb}, Rb_i, K_S$          |
| $K_{0.5}Rb_{0.5}CuZnZrS_4$               | Ordering I  | $V_{Rb}, Rb_{Cu}, Cu_S, Rb_{Zr}, Zn_{Cu}$                           |
| $K_{0.5}Rb_{0.5}CuZnZrS_4$               | Ordering II | $V_{Cu}, Rb_i, V_{Rb}, S_{Rb}, K_i$                                 |
| $K_{0.5}Rb_{0.5}GaSe_2$                  | Ordering I  | $Ga_K, Rb_K$                                                        |

## Linear Correlation between Elemental Features and Target Properties

Each compound in the dataset is represented by a 50-dimensional feature vector composed of 48 elemental descriptors and 2 ordering indicators. The elemental descriptors are constructed from 12 fundamental elemental properties evaluated for the A, B, C, and X crystallographic sites using composition-weighted averages. Two additional binary features encode the cation ordering type (**Table S4**). Using this representation, we computed Pearson correlation coefficients between each descriptor and the target properties  $\epsilon_{optical}$ ,  $\Delta H_{decomp}$ ,  $E_{gap}$ , and SLME. For clarity, only the most strongly correlated descriptors are discussed here. The dielectric constant  $\epsilon_{optical}$  is dominated by X-site properties, particularly the X-site heat of fusion, melting point, ionic radius, electronegativity, and heat of vaporization, confirming the central role of anion chemistry. In contrast,  $\Delta H_{decomp}$  is primarily governed by C-site

properties, with the C-site boiling point, heat of vaporization, electronegativity, melting point, and ionic radius showing the strongest correlations. The bandgap  $E_{gap}$  shows strong negative correlations with several A-site thermochemical descriptors (heat of vaporization, boiling point, heat of fusion, and melting point) and with the X-site atomic weight, reflecting the systematic reduction of  $E_{gap}$  with heavier and more weakly bound ions. Finally, SLME correlates most strongly with A-site properties, particularly the A-site ionization energy, electronegativity, melting point, heat of vaporization, and heat of fusion, while the A-site ionic radius shows a notable negative correlation. Overall, these trends reveal a clear site-wise chemical control of  $\epsilon_{optical}$  response, stability,  $E_{gap}$ , and photovoltaic efficiency, motivating the subsequent ML modeling.

Table S4: Full correlation table for Dielectric Constant, Decomposition Energy, Bandgap, and SLME.

| Dielectric Const        |        | Decomp                  |        | Bandgap            |        | SLME                    |       |
|-------------------------|--------|-------------------------|--------|--------------------|--------|-------------------------|-------|
| Feature                 | Corr   | Feature                 | Corr   | Feature            | Corr   | Feature                 | Corr  |
| $X_{Heat\_fusion}$      | 0.509  | $C_{BP}$                | 0.596  | $A_{Heat\_vap}$    | -0.492 | $A_{Ion\_Energy}$       | 0.359 |
| $X_{MP}$                | 0.507  | $C_{Heat\_vap}$         | 0.590  | $A_{BP}$           | -0.492 | $A_{Electronegativity}$ | 0.359 |
| $X_{Ion\_rad}$          | 0.507  | $C_{Electronegativity}$ | -0.529 | $A_{Heat\_fusion}$ | -0.491 | $A_{MP}$                | 0.358 |
| $X_{Electronegativity}$ | -0.501 | $C_{MP}$                | 0.526  | $A_{MP}$           | -0.489 | $A_{Heat\_vap}$         | 0.357 |
| $X_{Heat\_vap}$         | 0.499  | $C_{Ion\_rad}$          | 0.484  | $X_{At\_wt}$       | -0.482 | $A_{Heat\_fusion}$      | 0.356 |
| $A_{Heat\_vap}$         | 0.496  | $C_{Period}$            | 0.370  | $X_{Period}$       | -0.482 | $A_{BP}$                | 0.356 |
| $A_{BP}$                | 0.495  | $A_{Ion\_rad}$          | 0.330  | $X_{At\_num}$      | -0.482 | $A_{Elec\_Aff}$         | 0.356 |
| $X_{BP}$                | 0.493  | $C_{Elec\_Aff}$         | -0.314 | $X_{Ion\_Energy}$  | 0.481  | $A_{Density}$           | 0.352 |

Continued on next page

Table S4 – continued from previous page

| Dielectric Const               |        | Decomp                         |        | Bandgap                        |        | SLME                           |        |
|--------------------------------|--------|--------------------------------|--------|--------------------------------|--------|--------------------------------|--------|
| Feature                        | Corr   | Feature                        | Corr   | Feature                        | Corr   | Feature                        | Corr   |
| A <sub>Heat.fusion</sub>       | 0.493  | A <sub>Heat.vap</sub>          | -0.303 | X <sub>BP</sub>                | -0.481 | A <sub>Ion.rad</sub>           | -0.311 |
| X <sub>Ion.Energy</sub>        | -0.492 | A <sub>BP</sub>                | -0.302 | A <sub>Electronegativity</sub> | -0.481 | X <sub>Density</sub>           | 0.276  |
| A <sub>MP</sub>                | 0.490  | A <sub>Ion.Energy</sub>        | -0.297 | X <sub>Elec.Aff</sub>          | 0.481  | X <sub>Elec.Aff</sub>          | -0.267 |
| X <sub>At.wt</sub>             | 0.485  | A <sub>Heat.fusion</sub>       | -0.295 | A <sub>Ion.Energy</sub>        | -0.480 | X <sub>Period</sub>            | 0.263  |
| A <sub>Ion.Energy</sub>        | 0.484  | A <sub>MP</sub>                | -0.291 | X <sub>Heat.vap</sub>          | -0.479 | X <sub>At.num</sub>            | 0.263  |
| X <sub>Period</sub>            | 0.483  | A <sub>Electronegativity</sub> | -0.280 | A <sub>Elec.Aff</sub>          | -0.474 | X <sub>At.wt</sub>             | 0.262  |
| X <sub>At.num</sub>            | 0.483  | A <sub>Elec.Aff</sub>          | -0.270 | X <sub>Density</sub>           | -0.472 | X <sub>Ion.Energy</sub>        | -0.257 |
| A <sub>Electronegativity</sub> | 0.480  | A <sub>Density</sub>           | -0.249 | X <sub>Ion.rad</sub>           | -0.471 | X <sub>BP</sub>                | 0.256  |
| X <sub>Elec.Aff</sub>          | -0.476 | X <sub>Period</sub>            | 0.241  | X <sub>MP</sub>                | -0.471 | X <sub>Heat.vap</sub>          | 0.250  |
| A <sub>Elec.Aff</sub>          | 0.473  | X <sub>At.num</sub>            | 0.241  | A <sub>Density</sub>           | -0.469 | X <sub>Ion.rad</sub>           | 0.235  |
| A <sub>Density</sub>           | 0.460  | X <sub>At.wt</sub>             | 0.241  | X <sub>Heat.fusion</sub>       | -0.461 | X <sub>MP</sub>                | 0.234  |
| X <sub>Density</sub>           | 0.446  | X <sub>Elec.Aff</sub>          | -0.241 | A <sub>Ion.rad</sub>           | 0.427  | X <sub>Heat.fusion</sub>       | 0.222  |
| A <sub>Ion.rad</sub>           | -0.445 | X <sub>Ion.Energy</sub>        | -0.241 | X <sub>Electronegativity</sub> | 0.425  | X <sub>Electronegativity</sub> | -0.184 |
| B <sub>Electronegativity</sub> | 0.215  | X <sub>BP</sub>                | 0.241  | B <sub>Ion.Energy</sub>        | -0.303 | B <sub>Ion.Energy</sub>        | 0.157  |
| B <sub>MP</sub>                | -0.206 | X <sub>Heat.vap</sub>          | 0.240  | B <sub>Electronegativity</sub> | -0.290 | B <sub>BP</sub>                | -0.143 |
| B <sub>Ion.Energy</sub>        | 0.204  | X <sub>Density</sub>           | 0.238  | B <sub>MP</sub>                | 0.271  | B <sub>Electronegativity</sub> | 0.127  |
| B <sub>Density</sub>           | 0.202  | B <sub>Electronegativity</sub> | -0.235 | B <sub>Density</sub>           | -0.265 | Ordering II                    | 0.107  |

Continued on next page

Table S4 – continued from previous page

| Dielectric Const               |        | Decomp                         |        | Bandgap                        |        | SLME                           |        |
|--------------------------------|--------|--------------------------------|--------|--------------------------------|--------|--------------------------------|--------|
| Feature                        | Corr   | Feature                        | Corr   | Feature                        | Corr   | Feature                        | Corr   |
| B <sub>Elec_Aff</sub>          | 0.151  | X <sub>Ion_rad</sub>           | 0.235  | C <sub>Electronegativity</sub> | -0.261 | Ordering I                     | -0.107 |
| B <sub>Heat_fusion</sub>       | -0.145 | X <sub>MP</sub>                | 0.235  | C <sub>Heat_vap</sub>          | 0.247  | B <sub>Ion_rad</sub>           | -0.105 |
| B <sub>Ion_rad</sub>           | -0.131 | B <sub>Ion_rad</sub>           | 0.232  | C <sub>MP</sub>                | 0.247  | B <sub>MP</sub>                | -0.101 |
| B <sub>BP</sub>                | -0.126 | X <sub>Heat_fusion</sub>       | 0.230  | C <sub>BP</sub>                | 0.242  | B <sub>Density</sub>           | 0.095  |
| A <sub>Period</sub>            | -0.123 | B <sub>MP</sub>                | 0.221  | C <sub>Elec_Aff</sub>          | -0.225 | B <sub>Heat_vap</sub>          | -0.095 |
| C <sub>MP</sub>                | -0.091 | B <sub>Heat_vap</sub>          | -0.213 | B <sub>BP</sub>                | 0.217  | C <sub>At_wt</sub>             | 0.086  |
| C <sub>Heat_vap</sub>          | -0.087 | X <sub>Electronegativity</sub> | -0.211 | B <sub>Heat_fusion</sub>       | 0.198  | C <sub>At_num</sub>            | 0.084  |
| C <sub>BP</sub>                | -0.087 | A <sub>Period</sub>            | 0.194  | B <sub>Ion_rad</sub>           | 0.190  | C <sub>Density</sub>           | 0.075  |
| C <sub>Electronegativity</sub> | 0.084  | C <sub>Density</sub>           | 0.185  | Ordering I                     | 0.169  | B <sub>Heat_fusion</sub>       | -0.070 |
| B <sub>Heat_vap</sub>          | -0.063 | Ordering II                    | 0.170  | Ordering II                    | -0.169 | C <sub>Elec_Aff</sub>          | 0.066  |
| C <sub>Elec_Aff</sub>          | 0.058  | Ordering I                     | -0.170 | B <sub>Elec_Aff</sub>          | -0.162 | B <sub>Period</sub>            | -0.063 |
| C <sub>Ion_rad</sub>           | -0.044 | B <sub>Elec_Aff</sub>          | -0.141 | C <sub>Ion_rad</sub>           | 0.151  | A <sub>At_num</sub>            | 0.063  |
| C <sub>At_wt</sub>             | 0.042  | C <sub>Ion_Energy</sub>        | -0.128 | C <sub>Ion_Energy</sub>        | -0.140 | A <sub>Period</sub>            | -0.056 |
| C <sub>At_num</sub>            | 0.039  | B <sub>BP</sub>                | -0.121 | B <sub>Heat_vap</sub>          | 0.131  | C <sub>MP</sub>                | -0.056 |
| C <sub>Heat_fusion</sub>       | -0.038 | A <sub>At_wt</sub>             | 0.120  | C <sub>At_wt</sub>             | -0.119 | C <sub>Electronegativity</sub> | 0.053  |
| B <sub>At_num</sub>            | 0.037  | C <sub>At_num</sub>            | 0.115  | C <sub>At_num</sub>            | -0.110 | C <sub>Period</sub>            | 0.053  |
| C <sub>Density</sub>           | 0.033  | B <sub>Period</sub>            | 0.114  | A <sub>At_num</sub>            | -0.087 | A <sub>At_wt</sub>             | 0.049  |

Continued on next page

Table S4 – continued from previous page

| Dielectric Const        |        | Decomp                   |        | Bandgap                  |        | SLME                     |        |
|-------------------------|--------|--------------------------|--------|--------------------------|--------|--------------------------|--------|
| Feature                 | Corr   | Feature                  | Corr   | Feature                  | Corr   | Feature                  | Corr   |
| B <sub>At_wt</sub>      | 0.030  | B <sub>Heat_fusion</sub> | 0.110  | C <sub>Density</sub>     | -0.080 | C <sub>Heat_vap</sub>    | -0.044 |
| C <sub>Ion_Energy</sub> | 0.026  | A <sub>At_num</sub>      | 0.108  | C <sub>Heat_fusion</sub> | 0.070  | C <sub>Ion_Energy</sub>  | 0.041  |
| A <sub>At_num</sub>     | 0.023  | C <sub>Heat_fusion</sub> | 0.093  | A <sub>At_wt</sub>       | -0.069 | C <sub>BP</sub>          | -0.040 |
| Ordering II             | -0.019 | B <sub>Density</sub>     | -0.093 | A <sub>Period</sub>      | 0.065  | C <sub>Heat_fusion</sub> | -0.040 |
| Ordering I              | 0.019  | C <sub>At_wt</sub>       | 0.091  | B <sub>Period</sub>      | 0.048  | B <sub>At_wt</sub>       | -0.030 |
| B <sub>Period</sub>     | -0.018 | B <sub>At_num</sub>      | 0.051  | B <sub>At_num</sub>      | -0.030 | B <sub>At_num</sub>      | -0.027 |
| C <sub>Period</sub>     | -0.005 | B <sub>At_wt</sub>       | 0.049  | C <sub>Period</sub>      | 0.021  | B <sub>Elec_Aff</sub>    | 0.014  |
| A <sub>At_wt</sub>      | 0.003  | B <sub>Ion_Energy</sub>  | -0.036 | B <sub>At_wt</sub>       | -0.021 | C <sub>Ion_rad</sub>     | 0.004  |
